# Supplementary material for: Correlation between refractive errors and ocular biometric parameters at Al-Mustaqbal University, Iraq
Source: Research Square preprint supplement (doi:10.21203/rs.3.rs-5477082/v1), 2025-04-04
Supplement: Supplementary file 1 [file 40f1b5a2f7ff00db6a6da974.xlsx]

## Sheet: Sheet1
Patient	Age	Gender	Refractive Error	Axial Length	Corneal Radius	Central Corneal Thickness	Spherical Equivalent
ID				(AL) (mm)	(CR) (mm)	(CCT) (µm)	(SE) (diopter)
1	18	Female	Myopia	25.2745	6.1	562	-2.5
2	18	Female	Myopia	24.8603	7.5	564	-1.5
3	18	Female	Myopia	26.59	7.1	630	-6
4	18	Female	Myopia	25.5274	6.3	562	-3.25
5	18	Female	Myopia	24.8264	7.1	570	-1.5
6	18	Female	Myopia	25.0485	6.1	562	-2
7	18	Female	Myopia	25.1515	6.2	546	-2.25
8	18	Female	Myopia	24.7491	6.8	554	-1.25
9	18	Female	Myopia	24.7691	6.8	542	-1.25
10	18	Female	Myopia	24.9257	6.2	570	-1.75
11	18	Female	Myopia	25.5973	6.6	580	-3.5
12	18	Female	Myopia	25.0771	7.1	562	-2
13	18	Female	Myopia	24.7399	7.1	559	-1.25
14	18	Female	Myopia	25.3751	7.2	564	-2.75
15	18	Female	Myopia	25.6433	6.5	566	-3.5
16	18	Female	Myopia	25.4142	6.1	550	-3
17	18	Female	Myopia	24.9092	7.1	558	-1.5
18	18	Female	Myopia	25.0663	6.4	560	-2
19	18	Female	Myopia	24.7797	7.2	559	-1.25
20	18	Female	Myopia	24.9949	7	566	-1.75
21	18	Female	Myopia	25.7358	6.7	585	-4.5
22	18	Female	Myopia	25.5086	7.2	546	-3.25
23	18	Female	Myopia	25.5262	7.4	575	-3.25
24	18	Female	Myopia	24.9551	6.2	570	-1.75
25	18	Female	Myopia	25.1434	7.2	562	-2.25
26	18	Female	Myopia	24.9204	6.2	570	-1.75
27	18	Female	Myopia	24.559	6.5	554	-0.75
28	18	Female	Myopia	25.0609	7.3	562	-2
29	18	Female	Myopia	25.0942	7.5	565	-2
30	18	Female	Myopia	24.8036	6.7	546	-1.25
31	18	Female	Myopia	25.6	6.7	585	-4
32	18	Female	Myopia	25.1759	7.5	562	-2.25
33	18	Female	Myopia	24.5742	7	559	-0.75
34	18	Female	Myopia	26.29	6.4	610	-5.25
35	18	Female	Myopia	25.5369	6.3	562	-3.25
36	18	Female	Myopia	24.5598	7.1	576	-0.75
37	18	Female	Myopia	25.055	7.1	564	-2
38	18	Female	Myopia	25.3062	7.2	592	-2.75
39	18	Female	Myopia	24.8599	6.1	559	-1.5
40	18	Female	Myopia	26.19	6.2	600	-5
41	18	Female	Myopia	25.0823	7.5	562	-2
42	18	Female	Myopia	25.5302	6.8	550	-3.25
43	18	Female	Myopia	25.3009	6.5	562	-2.5
44	18	Female	Myopia	24.6287	7.2	559	-0.75
45	18	Female	Myopia	25.0931	7.1	562	-2
46	18	Female	Myopia	24.9109	6.2	559	-1.5
47	18	Female	Myopia	25.1052	6.6	562	-2
48	18	Female	Myopia	25.8936	7	592	-4.25
49	18	Female	Myopia	25.2306	6.4	562	-2.5
50	18	Female	Myopia	24.6376	6.4	559	-1
51	18	Female	Myopia	25.9469	7.3	575	-4.25
52	18	Female	Myopia	24.9337	6.5	559	-1.75
53	18	Female	Myopia	24.7361	7.3	559	-1.25
54	18	Female	Myopia	25.0377	7.4	562	-2
55	18	Female	Myopia	24.9365	7	559	-1.75
56	18	Female	Myopia	24.9139	7	546	-1.5
57	18	Female	Myopia	25.976	7.1	575	-4.5
58	18	Female	Myopia	24.7809	7	570	-1.25
59	18	Female	Myopia	25.0483	6.8	566	-2
60	18	Female	Myopia	24.8924	6.9	572	-1.5
61	18	Female	Myopia	25.4835	6.5	575	-3
62	18	Female	Myopia	25.4118	6.5	575	-3
63	18	Female	Myopia	25.1258	6.5	562	-2.25
64	18	Female	Myopia	25.2721	6.4	562	-2.5
65	18	Female	Myopia	24.7079	6.8	559	-1
66	18	Female	Myopia	25.5915	7	575	-3.5
67	18	Female	Myopia	25.1266	6.1	576	-2.25
68	18	Female	Myopia	25.3016	6.3	575	-2.75
69	18	Female	Myopia	25.2699	6.2	570	-2.5
70	18	Female	Myopia	25.0533	7.5	568	-2
71	18	Female	Myopia	25.0263	6.8	562	-2
72	18	Female	Myopia	24.9012	7.1	559	-1.5
73	18	Female	Myopia	25.0655	7.4	562	-2
74	18	Female	Myopia	25.3655	6.8	574	-2.75
75	18	Female	Myopia	25.2141	7.1	575	-2.5
76	18	Female	Myopia	25.5092	6.4	596	-3.25
77	18	Female	Myopia	25.4624	7.3	546	-3
78	18	Female	Myopia	25.284	7	586	-2.5
79	18	Female	Myopia	24.8307	6.3	550	-1.5
80	18	Female	Myopia	25.3743	7.1	575	-2.75
81	18	Female	Myopia	24.9531	6.6	562	-1.75
82	18	Female	Myopia	25.0685	7.5	570	-2
83	18	Female	Myopia	25.2156	7.3	562	-2.5
84	18	Female	Myopia	25.4598	6.9	575	-3
85	18	Female	Myopia	25.5806	7.5	582	-3.25
86	18	Female	Myopia	25.42	6.7	575	-3
87	18	Female	Myopia	24.8933	6.7	559	-1.5
88	18	Female	Myopia	25.4889	7.4	575	-3
89	18	Female	Myopia	25.5262	7.3	584	-3.25
90	18	Female	Myopia	24.9909	7	570	-1.75
91	18	Female	Myopia	24.839	7.4	570	-1.5
92	18	Female	Myopia	24.9876	6.8	562	-1.75
93	18	Female	Myopia	25.5957	7.4	575	-3.5
94	18	Female	Myopia	24.9453	6.2	548	-1.75
95	18	Female	Myopia	25.1579	7.5	562	-2.25
96	18	Female	Myopia	24.8452	6.2	559	-1.5
97	18	Female	Myopia	24.7706	6.8	559	-1.25
98	18	Female	Myopia	25.2691	6.4	575	-2.5
99	18	Female	Myopia	25.465	7	575	-3
100	18	Female	Myopia	24.496	7	560	-0.5
101	18	Female	Myopia	24.8158	6.8	559	-1.25
102	18	Female	Myopia	25.5709	7.1	575	-3.25
103	18	Female	Myopia	25.1734	6.7	562	-2.25
104	18	Female	Myopia	25.5277	6.9	562	-3.25
105	18	Female	Myopia	24.7708	7.3	559	-1.25
106	18	Female	Myopia	24.83	7	570	-1.5
107	18	Female	Myopia	24.7888	7.2	558	-1.25
108	18	Female	Myopia	25.3685	6.1	562	-2.75
109	18	Female	Myopia	24.6195	6.1	560	-0.75
110	18	Female	Myopia	24.9036	7.3	546	-1.5
111	18	Female	Myopia	24.6521	7.1	542	-1
112	18	Female	Myopia	25.3136	6.2	546	-2.75
113	18	Female	Myopia	25.283	7.2	580	-2.5
114	18	Female	Myopia	24.6621	6.5	559	-1
115	18	Female	Myopia	25.153	6.5	562	-2.25
116	18	Female	Myopia	25.1698	6.4	562	-2.25
117	18	Female	Myopia	24.9189	6.4	559	-1.5
118	18	Female	Myopia	25.044	6.9	562	-2
119	18	Female	Myopia	26.59	7.5	630	-6
120	18	Female	Myopia	25.0033	7	578	-1.75
121	18	Female	Myopia	25.4175	6.1	575	-3
122	18	Female	Myopia	25.4869	6.4	575	-3
123	18	Female	Myopia	24.7838	7.2	559	-1.25
124	18	Female	Myopia	25.0947	6.8	562	-2
125	18	Female	Myopia	24.49	7.4	559	-0.5
126	19	Female	Myopia	24.5583	7	559	-0.75
127	19	Female	Myopia	25.2894	6.4	546	-2.5
128	19	Female	Myopia	24.8466	6.2	559	-1.5
129	19	Female	Myopia	25.2394	7.5	590	-2.5
130	19	Female	Myopia	24.7304	6.9	558	-1.25
131	19	Female	Myopia	24.8147	6.5	566	-1.25
132	19	Female	Myopia	24.5765	6.6	559	-0.75
133	19	Female	Myopia	25.2387	6.1	566	-2.5
134	19	Female	Myopia	24.6828	6.9	559	-1
135	19	Female	Myopia	24.9812	7.5	564	-1.75
136	19	Female	Myopia	25.0127	6.4	562	-1.75
137	19	Female	Myopia	26.29	6.9	614	-5.25
138	19	Female	Myopia	25.1876	7.3	570	-2.25
139	19	Female	Myopia	25.3939	7	562	-2.75
140	19	Female	Myopia	24.5289	6.2	559	-0.5
141	19	Female	Myopia	24.8082	6.1	544	-1.25
142	19	Female	Myopia	24.6721	7.3	570	-1
143	19	Female	Myopia	24.9258	6.7	559	-1.75
144	19	Female	Myopia	25.0308	6.3	562	-2
145	19	Female	Myopia	25.5312	7	575	-3.25
146	19	Female	Myopia	24.9328	6.5	559	-1.75
147	19	Female	Myopia	24.5634	7	574	-0.75
148	19	Female	Myopia	24.9988	6.8	572	-1.75
149	19	Female	Myopia	25.3015	6.6	575	-2.75
150	19	Female	Myopia	25.3632	7	570	-2.75
151	19	Female	Myopia	25.2916	7	576	-2.5
152	19	Female	Myopia	24.7094	6.9	559	-1
153	19	Female	Myopia	25.3528	6.7	542	-2.75
154	19	Female	Myopia	24.8628	6.1	570	-1.5
155	19	Female	Myopia	24.6299	7.1	576	-0.75
156	19	Female	Myopia	25.3256	6.6	572	-2.75
157	19	Female	Myopia	25.0539	6.8	546	-2
158	19	Female	Myopia	25.3821	6.7	575	-2.75
159	19	Female	Myopia	25.6985	7	560	-4.5
160	19	Female	Myopia	26.59	7.5	624	-6
161	19	Female	Myopia	25.4866	6.5	596	-3
162	19	Female	Myopia	25.6531	7.3	558	-3.5
163	19	Female	Myopia	25.2627	6.3	575	-2.5
164	19	Female	Myopia	25.2143	6.9	575	-2.5
165	19	Female	Myopia	25.0709	7	546	-2
166	19	Female	Myopia	25.1876	7.5	575	-2.25
167	19	Female	Myopia	25.6673	6.1	575	-3.5
168	19	Female	Myopia	24.8687	6.1	550	-1.5
169	19	Female	Myopia	25.1731	6.1	562	-2.25
170	19	Female	Myopia	25.2819	7	566	-2.5
171	19	Female	Myopia	25.062	6.2	562	-2
172	19	Female	Myopia	25.6601	6.3	575	-4.5
173	19	Female	Myopia	24.8472	6.2	570	-1.5
174	19	Female	Myopia	25.6717	7.3	575	-4.5
175	19	Female	Myopia	24.7303	6.6	556	-1.25
176	19	Female	Myopia	24.49	6.9	576	-0.5
177	19	Female	Myopia	25.3439	6.7	582	-2.75
178	19	Female	Myopia	25.1968	6.2	575	-2.25
179	19	Female	Myopia	25.3321	6.3	575	-2.75
180	19	Female	Myopia	25.1726	7.2	575	-2.25
181	19	Female	Myopia	25.0447	6.9	562	-2
182	19	Female	Myopia	24.5946	6.8	566	-0.75
183	19	Female	Myopia	25.5498	6.6	575	-3.25
184	19	Female	Myopia	25.2245	7.2	562	-2.5
185	19	Female	Myopia	25.0469	7.1	562	-2
186	19	Female	Myopia	24.6288	7.5	576	-0.75
187	19	Female	Myopia	24.6796	7.2	554	-1
188	19	Female	Myopia	25.8792	7.2	546	-4.25
189	19	Female	Myopia	24.6962	7.3	570	-1
190	19	Female	Myopia	25.2762	6.3	556	-2.5
191	19	Female	Myopia	24.7651	6.3	559	-1.25
192	19	Female	Myopia	24.9909	7.2	550	-1.75
193	19	Female	Myopia	24.9013	7.1	559	-1.5
194	19	Female	Myopia	24.86	6.2	559	-1.5
195	19	Female	Myopia	24.5128	6.4	552	-0.5
196	19	Female	Myopia	24.7157	6.3	559	-1
197	19	Female	Myopia	25.2226	6.3	562	-2.5
198	19	Female	Myopia	24.9598	6.3	544	-1.75
199	19	Female	Myopia	24.7003	7.4	570	-1
200	19	Female	Myopia	24.871	6.3	564	-1.5
201	19	Female	Myopia	24.4906	6.2	559	-0.5
202	19	Female	Myopia	25.7044	6.7	575	-4.5
203	19	Female	Myopia	25.2518	7	568	-2.5
204	19	Female	Myopia	24.9476	6.2	570	-1.75
205	19	Female	Myopia	24.9266	6.7	559	-1.75
206	19	Female	Myopia	24.8674	7.4	568	-1.5
207	19	Female	Myopia	24.67	6.7	570	-1
208	19	Female	Myopia	25.1888	6.7	542	-2.25
209	19	Female	Myopia	26.59	6.9	594	-6
210	19	Female	Myopia	25.2324	6.3	562	-2.5
211	19	Female	Myopia	26.29	6.9	600	-5.25
212	19	Female	Myopia	24.9693	7.3	576	-1.75
213	19	Female	Myopia	24.6354	6.5	572	-1
214	19	Female	Myopia	25.3143	6.1	562	-2.75
215	19	Female	Myopia	25.5248	6.5	562	-3.25
216	19	Female	Myopia	24.8837	6.6	556	-1.5
217	19	Female	Myopia	25.5472	6.8	562	-3.25
218	19	Female	Myopia	24.7059	6.7	559	-1
219	19	Female	Myopia	24.8303	7.3	564	-1.5
220	19	Female	Myopia	24.6916	7.4	559	-1
221	19	Female	Myopia	24.902	7.5	559	-1.5
222	19	Female	Myopia	25.0468	6.2	578	-2
223	19	Female	Myopia	24.9506	6.5	576	-1.75
224	19	Female	Myopia	25.5711	7.4	554	-3.25
225	19	Female	Myopia	25.1264	6.1	562	-2.25
226	19	Female	Myopia	24.9926	6.3	562	-1.75
227	19	Female	Myopia	24.8223	6.3	572	-1.25
228	19	Female	Myopia	25.4648	6.1	575	-3
229	19	Female	Myopia	25.2921	6.7	562	-2.5
230	19	Female	Myopia	24.8417	7.1	570	-1.5
231	19	Female	Myopia	24.9462	6.4	559	-1.75
232	19	Female	Myopia	24.8026	7.4	570	-1.25
233	19	Female	Myopia	24.7166	6.8	562	-1
234	19	Female	Myopia	25.0623	7.5	570	-2
235	19	Female	Myopia	25.7441	6.5	575	-4.5
236	19	Female	Myopia	25.0466	6.6	548	-2
237	19	Female	Myopia	24.7509	7	559	-1.25
238	19	Female	Myopia	25.4422	7.4	575	-3
239	19	Female	Myopia	25.7001	6.7	575	-4.5
240	19	Female	Myopia	24.8858	6.3	559	-1.5
241	19	Female	Myopia	25.0942	7.1	552	-2
242	19	Female	Myopia	24.7874	6.2	559	-1.25
243	19	Female	Myopia	24.49	6.4	548	-0.5
244	19	Female	Myopia	24.8786	6.5	558	-1.5
245	19	Female	Myopia	25.0301	6.1	550	-2
246	19	Female	Myopia	26.0947	7.5	586	-4.75
247	19	Female	Myopia	24.8347	6.2	570	-1.5
248	19	Female	Myopia	25.0958	7	562	-2
249	19	Female	Myopia	25.4507	7.4	598	-3
250	19	Female	Myopia	24.49	6.1	559	-0.5
251	19	Female	Myopia	25.4913	6.2	575	-3
252	19	Female	Myopia	25.1589	7.5	562	-2.25
253	19	Female	Myopia	24.5446	7.4	559	-0.75
254	19	Female	Myopia	24.9985	6.3	559	-1.75
255	19	Female	Myopia	25.1837	6.3	574	-2.25
256	19	Female	Myopia	24.5904	7.2	564	-0.75
257	19	Female	Myopia	24.8451	6.8	570	-1.5
258	19	Female	Myopia	25.1295	6.6	562	-2.25
259	19	Female	Myopia	24.9924	7	570	-1.75
260	19	Female	Myopia	24.7005	6.1	559	-1
261	19	Female	Myopia	26.0609	6.1	595	-4.5
262	19	Female	Myopia	25.1636	7.1	562	-2.25
263	19	Female	Myopia	25.3703	6.2	562	-2.75
264	19	Female	Myopia	25.4295	7.5	572	-3
265	19	Female	Myopia	25.163	6.1	550	-2.25
266	19	Female	Myopia	25.2198	7	575	-2.5
267	19	Female	Myopia	25.3104	6.8	575	-2.75
268	19	Female	Myopia	25.4605	7	584	-3
269	19	Female	Myopia	24.8553	6.6	570	-1.5
270	19	Female	Myopia	25.5563	7	562	-3.25
271	19	Female	Myopia	25.3682	6.4	590	-2.75
272	19	Female	Myopia	24.8957	7	559	-1.5
273	19	Female	Myopia	24.6892	6.2	559	-1
274	19	Female	Myopia	25.6358	6.2	575	-4.5
275	19	Female	Myopia	24.49	7.2	559	-0.5
276	19	Female	Myopia	25.3239	7.4	562	-2.75
277	19	Female	Myopia	25.8128	7.4	585	-4
278	19	Female	Myopia	26.19	6.5	594	-5
279	19	Female	Myopia	24.9246	7.2	570	-1.75
280	19	Female	Myopia	25.5527	6.4	575	-3.25
281	19	Female	Myopia	25.5033	6.1	575	-3.25
282	19	Female	Myopia	25.2664	6.6	556	-2.5
283	19	Female	Myopia	24.6427	7.5	560	-1
284	19	Female	Myopia	24.9899	6.8	562	-1.75
285	18	Male	Myopia	24.8883	6.5	570	-1.75
286	18	Male	Myopia	24.544	7.3	572	-1
287	18	Male	Myopia	25.3309	7.1	575	-3
288	18	Male	Myopia	24.6418	7.2	570	-1.25
289	18	Male	Myopia	25.4348	6.2	566	-3.25
290	18	Male	Myopia	25.5942	6.1	562	-4.25
291	18	Male	Myopia	24.8518	6.5	558	-1.75
292	18	Male	Myopia	24.4273	7.5	559	-0.5
293	18	Male	Myopia	24.9483	7	574	-2
294	18	Male	Myopia	26.1104	7.1	598	-5
295	18	Male	Myopia	25.1101	7	556	-2.25
296	18	Male	Myopia	25.4122	7.5	575	-3.25
297	18	Male	Myopia	24.6808	7.5	559	-1.25
298	18	Male	Myopia	25.3501	6.9	575	-3
299	18	Male	Myopia	24.9933	6.3	559	-2
300	18	Male	Myopia	25.4	6.1	575	-3
301	18	Male	Myopia	24.7528	6.4	550	-1.5
302	18	Male	Myopia	24.8424	6.9	559	-1.75
303	18	Male	Myopia	24.4	7.2	559	-0.5
304	18	Male	Myopia	25.0379	6.9	562	-2.25
305	18	Male	Myopia	25.8412	7.5	585	-4.25
306	18	Male	Myopia	25.06	6.1	574	-2.25
307	18	Male	Myopia	24.6625	6.1	548	-1.25
308	18	Male	Myopia	24.6874	6.4	546	-1.25
309	18	Male	Myopia	24.9074	6.5	570	-1.75
310	18	Male	Myopia	25.2344	7.4	575	-2.75
311	18	Male	Myopia	24.7761	6.5	559	-1.5
312	18	Male	Myopia	24.9499	6.7	559	-2
313	18	Male	Myopia	24.4427	7.3	568	-0.5
314	18	Male	Myopia	25.2831	6.7	548	-2.75
315	18	Male	Myopia	25.4731	7.2	590	-3.25
316	18	Male	Myopia	25.2367	7.1	562	-2.75
317	18	Male	Myopia	25.6154	6.5	562	-4.25
318	18	Male	Myopia	24.4	7.2	559	-0.5
319	18	Male	Myopia	25.3942	6.7	580	-3
320	18	Male	Myopia	25.3757	7	575	-3
321	18	Male	Myopia	25.3624	6.5	584	-3
322	18	Male	Myopia	24.5982	6.6	559	-1
323	18	Male	Myopia	24.9257	7.4	570	-2
324	18	Male	Myopia	24.9755	6.1	554	-2
325	18	Male	Myopia	25.0852	7.5	560	-2.25
326	18	Male	Myopia	25.1739	6.8	562	-2.5
327	18	Male	Myopia	24.924	6.9	570	-1.75
328	18	Male	Myopia	24.4	7.4	562	-0.5
329	18	Male	Myopia	24.4485	7.2	559	-0.75
330	18	Male	Myopia	26.3	7.3	582	-5.5
331	18	Male	Myopia	24.8003	7.3	559	-1.5
332	18	Male	Myopia	24.8425	6.1	559	-1.75
333	18	Male	Myopia	25.0914	6.4	586	-2.25
334	18	Male	Myopia	24.7879	7.5	559	-1.5
335	18	Male	Myopia	24.7793	7.1	559	-1.5
336	18	Male	Myopia	24.8334	7.3	566	-1.75
337	18	Male	Myopia	25.6824	7.5	575	-4.25
338	18	Male	Myopia	25.0237	7.5	559	-2.25
339	18	Male	Myopia	24.9736	6.2	559	-2
340	18	Male	Myopia	25.0008	6.8	559	-2
341	18	Male	Myopia	24.7398	7.1	559	-1.5
342	18	Male	Myopia	25.1108	7	562	-2.25
343	18	Male	Myopia	24.434	6.1	559	-0.5
344	18	Male	Myopia	26.1436	7.4	612	-5
345	18	Male	Myopia	25.4266	7	594	-3.25
346	18	Male	Myopia	25.0523	6.9	564	-2.25
347	18	Male	Myopia	24.9088	7.5	559	-1.75
348	18	Male	Myopia	24.7872	7.5	548	-1.5
349	18	Male	Myopia	26.2	6.2	590	-5.25
350	18	Male	Myopia	24.6714	7.1	559	-1.25
351	18	Male	Myopia	25.021	7.4	562	-2.25
352	18	Male	Myopia	24.9691	6.2	562	-2
353	18	Male	Myopia	24.913	6.4	558	-1.75
354	18	Male	Myopia	24.9404	7.5	558	-2
355	18	Male	Myopia	24.9464	7.5	558	-2
356	18	Male	Myopia	26.0398	6.4	585	-4.75
357	18	Male	Myopia	25.2547	6.6	546	-2.75
358	18	Male	Myopia	24.7796	7.3	558	-1.5
359	18	Male	Myopia	25.5238	7	585	-4.5
360	18	Male	Myopia	25.4761	6.4	572	-3.25
361	18	Male	Myopia	24.7558	6.5	558	-1.5
362	18	Male	Myopia	24.8388	7.1	558	-1.75
363	18	Male	Myopia	24.5413	7.1	558	-0.75
364	18	Male	Myopia	26.4	6.6	600	-5.75
365	18	Male	Myopia	25.0857	6.5	562	-2.25
366	18	Male	Myopia	24.6148	6.9	564	-1
367	18	Male	Myopia	26.5	7.1	620	-6
368	18	Male	Myopia	25.3623	7.1	575	-3
369	18	Male	Myopia	24.9391	7.3	558	-2
370	18	Male	Myopia	26.4	6.2	580	-5.75
371	18	Male	Myopia	26.1	6.8	590	-5
372	18	Male	Myopia	24.8009	7.3	550	-1.5
373	18	Male	Myopia	24.9942	6.3	570	-2
374	18	Male	Myopia	24.4	7.3	556	-0.5
375	19	Male	Myopia	24.682	6.3	558	-1.25
376	19	Male	Myopia	24.6829	7.2	558	-1.25
377	19	Male	Myopia	24.4	6.9	558	-0.5
378	19	Male	Myopia	25.3098	6.5	570	-3
379	19	Male	Myopia	25.1593	6.6	544	-2.5
380	19	Male	Myopia	24.6165	7.5	558	-1
381	19	Male	Myopia	25.4756	7.4	570	-3.25
382	19	Male	Myopia	26.1882	6.3	580	-5.25
383	19	Male	Myopia	24.5528	6.6	570	-1
384	19	Male	Myopia	25.2737	7	570	-2.75
385	19	Male	Myopia	24.7521	7.2	574	-1.5
386	19	Male	Myopia	24.6707	7.3	558	-1.25
387	19	Male	Myopia	25.0574	7	562	-2.25
388	19	Male	Myopia	24.9287	7.1	558	-2
389	19	Male	Myopia	26.2	6.4	600	-5.25
390	19	Male	Myopia	25.1422	6.1	562	-2.5
391	19	Male	Myopia	25.0279	6.2	574	-2.25
392	19	Male	Myopia	24.4517	6.8	558	-0.75
393	19	Male	Myopia	24.7677	6.9	560	-1.5
394	19	Male	Myopia	25.0519	6.2	562	-2.25
395	19	Male	Myopia	25.0432	7.2	562	-2.25
396	19	Male	Myopia	25.269	6.5	562	-2.75
397	19	Male	Myopia	24.4	6.9	558	-0.5
398	19	Male	Myopia	24.8953	6.6	562	-1.75
399	19	Male	Myopia	25.036	7.4	562	-2.25
400	19	Male	Myopia	25.7024	6.7	585	-4
401	19	Male	Myopia	25.8	6.3	590	-5
402	19	Male	Myopia	24.4	6.2	560	-0.5
403	19	Male	Myopia	24.6196	6.9	570	-1
404	19	Male	Myopia	24.8854	7.4	570	-1.75
405	19	Male	Myopia	24.6881	7.3	570	-1.25
406	19	Male	Myopia	25.1173	6.2	570	-2.5
407	19	Male	Myopia	25.3409	6.6	575	-3
408	19	Male	Myopia	25.3355	6.2	575	-3
409	19	Male	Myopia	25.2159	6.9	562	-2.75
410	19	Male	Myopia	24.776	6.4	558	-1.5
411	19	Male	Myopia	24.8103	6.1	558	-1.5
412	19	Male	Myopia	24.4516	7.2	560	-0.75
413	19	Male	Myopia	25.1121	6.5	570	-2.25
414	19	Male	Myopia	24.7314	7.3	560	-1.25
415	19	Male	Myopia	24.7499	6.8	588	-1.5
416	19	Male	Myopia	24.937	6.3	570	-2
417	19	Male	Myopia	25.2119	6.7	570	-2.75
418	19	Male	Myopia	25.0321	6.7	562	-2.25
419	19	Male	Myopia	25.8127	7.2	542	-4.25
420	19	Male	Myopia	25.0266	6.5	582	-2.25
421	19	Male	Myopia	24.9206	6.9	570	-1.75
422	19	Male	Myopia	24.6692	6.2	548	-1.25
423	19	Male	Myopia	25.163	7.1	588	-2.5
424	19	Male	Myopia	25.0363	6.5	562	-2.25
425	19	Male	Myopia	24.9111	6.5	570	-1.75
426	19	Male	Myopia	24.6419	6.7	544	-1.25
427	19	Male	Myopia	25.5678	6.1	580	-4.5
428	19	Male	Myopia	24.8388	7.5	562	-1.75
429	19	Male	Myopia	24.7112	6.3	570	-1.25
430	19	Male	Myopia	26.168	7	590	-5.25
431	19	Male	Myopia	25.9062	7.4	590	-4.5
432	19	Male	Myopia	24.8196	7	554	-1.5
433	19	Male	Myopia	24.9515	7.2	570	-2
434	19	Male	Myopia	25.6968	6.6	584	-4
435	19	Male	Myopia	25.3045	6.1	584	-2.75
436	19	Male	Myopia	24.4	6.4	548	-0.5
437	19	Male	Myopia	24.7344	7.5	558	-1.5
438	19	Male	Myopia	25.1172	6.8	570	-2.5
439	19	Male	Myopia	24.6457	6.3	558	-1.25
440	19	Male	Myopia	25.5516	6.8	580	-4.5
441	19	Male	Myopia	24.5426	7.5	558	-0.75
442	19	Male	Myopia	24.7512	6.3	566	-1.5
443	19	Male	Myopia	25.4726	7	588	-3.25
444	19	Male	Myopia	25.1797	6.8	562	-2.5
445	19	Male	Myopia	24.7313	6.6	558	-1.25
446	19	Male	Myopia	25.3621	6.8	562	-3
447	19	Male	Myopia	24.8712	6.1	558	-1.75
448	19	Male	Myopia	25.2235	7.3	578	-2.75
449	19	Male	Myopia	25.4871	6.8	562	-3.25
450	19	Male	Myopia	25.3424	6.2	572	-3
451	19	Male	Myopia	25.3148	6.4	562	-3
452	19	Male	Myopia	25.6313	6.9	586	-3.75
453	19	Male	Myopia	24.6491	6.4	566	-1.25
454	19	Male	Myopia	24.5494	6.5	570	-1
455	19	Male	Myopia	25.1362	6.5	554	-2.5
456	19	Male	Myopia	24.6174	6.6	570	-1
457	19	Male	Myopia	25.0941	7.3	592	-2.25
458	19	Male	Myopia	25.4664	6.7	598	-3.25
459	19	Male	Myopia	24.8614	7.2	558	-1.75
460	19	Male	Myopia	25.4833	6.5	562	-3.25
461	19	Male	Myopia	24.4343	6.2	542	-0.5
462	19	Male	Myopia	25.3376	6.3	562	-3
463	19	Male	Myopia	24.6837	7.4	570	-1.25
464	19	Male	Myopia	24.4	7.5	558	-0.5
465	19	Male	Myopia	24.9486	7	558	-2
466	19	Male	Myopia	25.4072	6.8	582	-3.25
467	19	Male	Myopia	24.6866	6.6	558	-1.25
468	19	Male	Myopia	25.4689	7.2	586	-3.25
469	19	Male	Myopia	24.8098	6.7	558	-1.5
470	19	Male	Myopia	24.7897	6.1	558	-1.5
471	20	Female	Myopia	24.9515	7.1	560	-1.75
472	20	Female	Myopia	25.5162	6.6	574	-3.25
473	20	Female	Myopia	25.1157	7.2	562	-2.25
474	20	Female	Myopia	24.9371	7	556	-1.75
475	20	Female	Myopia	25.7169	6.5	570	-3.75
476	20	Female	Myopia	25.7781	7.5	562	-3.75
477	20	Female	Myopia	24.49	7.4	558	-0.5
478	20	Female	Myopia	25.6177	6.5	590	-4.5
479	20	Female	Myopia	24.6623	6.8	558	-1
480	20	Female	Myopia	25.3558	7.3	568	-2.75
481	20	Female	Myopia	25.2616	7.5	556	-2.5
482	20	Female	Myopia	25.0784	6.9	562	-2
483	20	Female	Myopia	25.041	6.5	546	-2
484	20	Female	Myopia	25.3703	6.1	562	-2.75
485	20	Female	Myopia	25.6613	7.5	542	-4.5
486	20	Female	Myopia	24.8946	6.7	570	-1.5
487	20	Female	Myopia	25.6063	6.2	562	-3.5
488	20	Female	Myopia	24.9013	6.6	570	-1.5
489	20	Female	Myopia	25.0335	7.2	546	-2
490	20	Female	Myopia	25.2035	7.5	562	-2.25
491	20	Female	Myopia	26.49	7.2	582	-5.75
492	20	Female	Myopia	25.6826	7.3	558	-3.5
493	20	Female	Myopia	24.49	7.3	562	-0.5
494	20	Female	Myopia	24.7872	7.2	578	-1.25
495	20	Female	Myopia	26.39	6.9	590	-5.5
496	20	Female	Myopia	24.6557	6.8	558	-1
497	20	Female	Myopia	24.49	6.4	565	-0.5
498	20	Female	Myopia	25.5599	6.7	578	-3.25
499	20	Female	Myopia	25.0045	6.9	564	-1.75
500	20	Female	Myopia	25.2316	6.5	552	-2.5
501	20	Female	Myopia	24.8148	7.1	558	-1.25
502	20	Female	Myopia	25.0327	7.5	570	-2
503	20	Female	Myopia	25.2352	6.6	562	-2.5
504	20	Female	Myopia	24.9279	7	558	-1.75
505	20	Female	Myopia	24.49	6.2	565	-0.5
506	20	Female	Myopia	24.7942	6.6	558	-1.25
507	20	Female	Myopia	24.9114	6.4	558	-1.5
508	20	Female	Myopia	25.3606	7.4	542	-2.75
509	20	Female	Myopia	25.1404	7.4	562	-2.25
510	20	Female	Myopia	24.5936	6.8	572	-0.75
511	20	Female	Myopia	24.9989	6.2	562	-1.75
512	20	Female	Myopia	24.49	7.4	550	-0.5
513	20	Female	Myopia	25.4228	6.9	576	-3
514	20	Female	Myopia	25.372	7.5	546	-2.75
515	20	Female	Myopia	25.45	6.1	568	-3
516	20	Female	Myopia	24.9409	6.6	558	-1.75
517	20	Female	Myopia	25.34	6.6	556	-2.75
518	20	Female	Myopia	24.6323	7.3	558	-0.75
519	20	Female	Myopia	25.1694	7.1	562	-2.25
520	20	Female	Myopia	24.7657	6.4	558	-1.25
521	20	Female	Myopia	25.4662	7	560	-3
522	20	Female	Myopia	25.7169	6.3	578	-3.75
523	20	Female	Myopia	24.7576	6.3	560	-1.25
524	20	Female	Myopia	25.3707	7.3	562	-2.75
525	20	Female	Myopia	25.2452	7.3	562	-2.5
526	20	Female	Myopia	25.5294	6.1	562	-3.25
527	20	Female	Myopia	25.0547	7.2	562	-2
528	20	Female	Myopia	24.825	6.9	565	-1.5
529	20	Female	Myopia	25.2511	7.1	574	-2.5
530	20	Female	Myopia	25.3026	6.5	594	-2.75
531	20	Female	Myopia	24.7131	7.3	558	-1
532	20	Female	Myopia	24.9792	6.2	550	-1.75
533	20	Female	Myopia	25.2574	7.2	562	-2.5
534	20	Female	Myopia	24.961	6.8	542	-1.75
535	20	Female	Myopia	24.5483	6.7	558	-0.75
536	20	Female	Myopia	25.3959	7.5	544	-2.75
537	20	Female	Myopia	25.2573	7.4	576	-2.5
538	20	Female	Myopia	25.1734	7	562	-2.25
539	20	Female	Myopia	25.7253	7.3	564	-3.75
540	20	Female	Myopia	26.19	6.3	590	-5
541	20	Female	Myopia	25.5408	6.6	562	-3.25
542	20	Female	Myopia	25.3734	6.1	562	-2.75
543	20	Female	Myopia	25.3426	7.2	592	-2.75
544	20	Female	Myopia	25.3638	7.1	574	-2.75
545	20	Female	Myopia	25.1879	6.9	566	-2.25
546	20	Female	Myopia	24.7954	7	558	-1.25
547	20	Female	Myopia	25.4231	7	588	-3
548	20	Female	Myopia	24.9359	7	558	-1.75
549	20	Female	Myopia	25.2782	7.5	552	-2.5
550	20	Female	Myopia	25.0422	7.1	552	-2
551	20	Female	Myopia	24.6093	6.3	565	-0.75
552	20	Female	Myopia	25.1791	6.5	562	-2.25
553	20	Female	Myopia	25.0833	6.8	570	-2
554	20	Female	Myopia	25.2292	7.2	562	-2.5
555	20	Female	Myopia	25.0494	6.8	572	-2
556	20	Female	Myopia	25.2406	6.5	562	-2.5
557	20	Female	Myopia	25.1285	6.7	562	-2.25
558	20	Female	Myopia	25.636	6.2	562	-3.5
559	20	Female	Myopia	25.1639	7.1	562	-2.25
560	20	Female	Myopia	25.0727	7	562	-2
561	20	Female	Myopia	24.6369	7.1	558	-1
562	20	Female	Myopia	24.5321	6.8	560	-0.5
563	20	Female	Myopia	25.4585	7	578	-3
564	20	Female	Myopia	24.6745	7.3	558	-1
565	20	Female	Myopia	25.3534	7.2	562	-2.75
566	20	Female	Myopia	24.8956	6.4	558	-1.5
567	20	Female	Myopia	24.7841	6.2	570	-1.25
568	20	Female	Myopia	25.2907	6.7	586	-2.5
569	20	Female	Myopia	24.9645	6.9	562	-1.75
570	20	Female	Myopia	24.49	7.3	558	-0.5
571	20	Female	Myopia	25.2076	6.4	570	-2.5
572	20	Female	Myopia	25.3381	7.3	562	-2.75
573	20	Female	Myopia	25.1674	6.4	562	-2.25
574	20	Female	Myopia	25.454	6.2	562	-3
575	20	Female	Myopia	25.4808	6.8	548	-3
576	20	Female	Myopia	25.0119	6.9	562	-1.75
577	20	Female	Myopia	24.49	6.5	576	-0.5
578	20	Female	Myopia	25.4238	6.7	570	-3
579	20	Female	Myopia	25.1764	7.1	562	-2.25
580	20	Female	Myopia	25.5748	6.5	562	-3.25
581	20	Female	Myopia	24.7344	7.3	558	-1.25
582	20	Female	Myopia	25.1814	7.1	556	-2.25
583	20	Female	Myopia	25.3195	6.4	562	-2.75
584	20	Female	Myopia	24.49	6.8	558	-0.5
585	20	Female	Myopia	25.0888	7.5	574	-2
586	20	Female	Myopia	24.49	6.4	558	-0.5
587	20	Female	Myopia	25.4385	6.2	570	-3
588	20	Female	Myopia	24.8266	6.3	570	-1.5
589	20	Female	Myopia	25.5934	6.5	570	-3.5
590	20	Female	Myopia	25.5265	7.1	570	-3.25
591	20	Female	Myopia	25.0241	6.8	562	-2
592	20	Female	Myopia	25.4007	6.6	570	-3
593	20	Female	Myopia	25.3443	6.5	570	-2.75
594	20	Female	Myopia	25.2621	6.4	570	-2.5
595	20	Female	Myopia	25.383	6.1	570	-2.75
596	20	Female	Myopia	26.59	7	630	-6
597	20	Female	Myopia	25.0276	6.8	570	-2
598	20	Female	Myopia	24.6042	6.7	565	-0.75
599	20	Female	Myopia	24.4941	6.3	558	-0.5
600	20	Female	Myopia	24.8889	7	558	-1.5
601	20	Female	Myopia	26.29	6.5	590	-5.25
602	20	Female	Myopia	24.49	7	564	-0.5
603	20	Female	Myopia	24.609	6.6	560	-0.75
604	20	Female	Myopia	25.2367	7	570	-2.5
605	20	Female	Myopia	24.9893	6.2	562	-1.75
606	20	Female	Myopia	24.9917	6.2	570	-1.75
607	20	Female	Myopia	25.1337	6.1	568	-2.25
608	20	Female	Myopia	25.1844	7	580	-2.25
609	20	Female	Myopia	24.842	6.7	558	-1.5
610	20	Female	Myopia	24.49	7.3	558	-0.5
611	20	Female	Myopia	24.5232	6.1	560	-0.5
612	20	Female	Myopia	25.1609	7	556	-2.25
613	20	Female	Myopia	25.5361	7	548	-3.25
614	20	Female	Myopia	24.879	7.3	558	-1.5
615	20	Female	Myopia	25.1506	7.4	562	-2.25
616	20	Female	Myopia	24.49	7.3	544	-0.5
617	20	Female	Myopia	24.9958	6.4	562	-1.75
618	20	Female	Myopia	24.7154	7.1	565	-1
619	20	Female	Myopia	24.8017	6.2	565	-1.25
620	20	Female	Myopia	25.2953	6.6	562	-2.5
621	21	Female	Myopia	25.0283	7.1	586	-2
622	21	Female	Myopia	25.2143	7.4	562	-2.5
623	21	Female	Myopia	26.29	6.8	590	-5.25
624	21	Female	Myopia	24.5298	7.5	558	-0.5
625	21	Female	Myopia	25.3992	6.1	570	-3
626	21	Female	Myopia	25.2688	6.4	580	-2.5
627	21	Female	Myopia	25.7962	6.6	552	-4
628	21	Female	Myopia	25.6934	7.2	570	-3.75
629	21	Female	Myopia	25.6378	6.5	570	-3.5
630	21	Female	Myopia	25.3603	7.5	584	-2.75
631	21	Female	Myopia	25.0184	7.3	562	-2
632	21	Female	Myopia	26.19	7.4	598	-5
633	21	Female	Myopia	24.7351	7.5	558	-1.25
634	21	Female	Myopia	25.1794	7.1	562	-2.25
635	21	Female	Myopia	26.19	6.6	590	-5
636	21	Female	Myopia	26.59	6.6	630	-6
637	21	Female	Myopia	25.169	6.7	558	-2.25
638	21	Female	Myopia	24.9998	6.8	562	-1.75
639	21	Female	Myopia	25.5682	6.5	570	-3.25
640	21	Female	Myopia	25.2034	7.5	548	-2.25
641	21	Female	Myopia	25.1935	6.2	575	-2.25
642	21	Female	Myopia	25.0793	7.1	562	-2
643	21	Female	Myopia	24.7837	6.6	558	-1.25
644	21	Female	Myopia	25.1762	6.8	575	-2.25
645	21	Female	Myopia	25.2578	7.3	562	-2.5
646	21	Female	Myopia	25.6664	6.9	580	-3.5
647	21	Female	Myopia	25.6918	6.2	542	-3.75
648	21	Female	Myopia	24.8392	7.5	558	-1.5
649	21	Female	Myopia	25.0954	7.3	562	-2
650	21	Female	Myopia	24.7329	6.5	558	-1.25
651	21	Female	Myopia	25.2554	7.3	562	-2.5
652	21	Female	Myopia	24.6868	7.1	562	-1
653	21	Female	Myopia	24.689	6.8	558	-1
654	21	Female	Myopia	25.3264	6.3	562	-2.75
655	21	Female	Myopia	25.2811	7.5	570	-2.5
656	21	Female	Myopia	25.289	7	570	-2.5
657	21	Female	Myopia	24.5529	6.6	542	-0.75
658	21	Female	Myopia	24.49	7.3	542	-0.5
659	21	Female	Myopia	25.015	6.6	562	-1.75
660	21	Female	Myopia	25.2989	7.3	562	-2.5
661	21	Female	Myopia	25.2487	6.2	578	-2.5
662	21	Female	Myopia	26.1458	6.6	585	-4.75
663	21	Female	Myopia	24.49	6.6	558	-0.5
664	21	Female	Myopia	25.5626	7.1	580	-3.25
665	21	Female	Myopia	25.2068	7.4	546	-2.5
666	21	Female	Myopia	24.5698	7	554	-0.75
667	21	Female	Myopia	25.1793	7.2	588	-2.25
668	21	Female	Myopia	24.6611	6.3	558	-1
669	21	Female	Myopia	25.6181	6.5	575	-3.5
670	21	Female	Myopia	25.0869	7.2	570	-2
671	21	Female	Myopia	25.007	6.6	562	-1.75
672	21	Female	Myopia	25.2236	7.2	548	-2.5
673	21	Female	Myopia	24.8474	6.9	558	-1.5
674	21	Female	Myopia	25.0406	6.1	566	-2
675	21	Female	Myopia	24.49	6.1	558	-0.5
676	21	Female	Myopia	25.6114	6.1	575	-3.5
677	21	Female	Myopia	24.9161	6.7	565	-1.5
678	21	Female	Myopia	25.2716	7.4	558	-2.5
679	21	Female	Myopia	25.4402	7.5	582	-3
680	21	Female	Myopia	25.1291	6.9	576	-2.25
681	21	Female	Myopia	25.146	7.5	558	-2.25
682	21	Female	Myopia	25.5126	6.9	570	-3.25
683	21	Female	Myopia	25.234	6.9	570	-2.5
684	21	Female	Myopia	25.389	6.2	570	-2.75
685	21	Female	Myopia	25.1333	7.1	570	-2.25
686	21	Female	Myopia	25.0921	7	570	-2
687	21	Female	Myopia	25.0776	7.4	570	-2
688	21	Female	Myopia	25.4406	6.2	580	-3
689	21	Female	Myopia	24.6945	7	568	-1
690	21	Female	Myopia	25.1298	7.3	558	-2.25
691	21	Female	Myopia	24.9026	6.6	558	-1.5
692	21	Female	Myopia	25.1178	6.2	554	-2.25
693	21	Female	Myopia	25.5478	6.7	548	-3.25
694	21	Female	Myopia	24.994	6.6	558	-1.75
695	21	Female	Myopia	25.5918	7	580	-3.5
696	21	Female	Myopia	25.2434	6.3	558	-2.5
697	21	Female	Myopia	25.6097	6.8	570	-3.5
698	21	Female	Myopia	25.2265	6.1	570	-2.5
699	21	Female	Myopia	25.2764	7.5	570	-2.5
700	21	Female	Myopia	24.9799	7	558	-1.75
701	21	Female	Myopia	24.7949	6.4	565	-1.25
702	21	Female	Myopia	24.7093	7.5	558	-1
703	21	Female	Myopia	25.337	7.4	580	-2.75
704	21	Female	Myopia	24.6806	6.6	558	-1
705	21	Female	Myopia	24.7861	7.2	558	-1.25
706	21	Female	Myopia	25.0489	6.8	578	-2
707	21	Female	Myopia	25.4023	7.3	578	-3
708	21	Female	Myopia	24.6259	6.2	558	-0.75
709	21	Female	Myopia	25.1544	6.2	558	-2.25
710	21	Female	Myopia	25.0439	6.3	558	-2
711	21	Female	Myopia	24.7742	6.2	558	-1.25
712	21	Female	Myopia	24.6356	7.2	558	-1
713	21	Female	Myopia	25.4903	7.2	570	-3
714	21	Female	Myopia	25.5485	7.2	570	-3.25
715	21	Female	Myopia	24.9879	6.6	554	-1.75
716	21	Female	Myopia	25.0574	6.1	558	-2
717	21	Female	Myopia	25.0743	7.1	558	-2
718	21	Female	Myopia	25.997	6.5	590	-4.5
719	21	Female	Myopia	24.6523	7.4	558	-1
720	21	Female	Myopia	25.3621	7.4	580	-2.75
721	21	Female	Myopia	25.0461	6.9	558	-2
722	21	Female	Myopia	24.49	7	555	-0.5
723	21	Female	Myopia	24.8154	6.4	558	-1.25
724	21	Female	Myopia	25.138	7.4	558	-2.25
725	21	Female	Myopia	24.848	6.5	566	-1.5
726	21	Female	Myopia	24.8481	6.1	570	-1.5
727	21	Female	Myopia	25.7901	6.6	578	-4
728	21	Female	Myopia	24.5919	7.5	560	-0.75
729	21	Female	Myopia	25.1742	7.5	565	-2.25
730	21	Female	Myopia	24.9313	6.9	565	-1.75
731	21	Female	Myopia	25.1288	7.4	565	-2.25
732	21	Female	Myopia	24.49	7.3	558	-0.5
733	21	Female	Myopia	25.028	7.4	572	-2
734	21	Female	Myopia	25.4811	6.3	560	-3
735	21	Female	Myopia	24.649	7.4	558	-1
736	21	Female	Myopia	24.983	6.5	558	-1.75
737	21	Female	Myopia	24.49	7.4	578	-0.5
738	21	Female	Myopia	24.9815	6.7	558	-1.75
739	21	Female	Myopia	24.886	7.4	558	-1.5
740	21	Female	Myopia	25.3735	6.9	558	-2.75
741	21	Female	Myopia	24.49	6.7	558	-0.5
742	21	Female	Myopia	25.0615	6.8	558	-2
743	21	Female	Myopia	24.6157	6.7	558	-0.75
744	21	Female	Myopia	24.7331	6.7	564	-1.25
745	21	Female	Myopia	24.578	7	578	-0.75
746	21	Female	Myopia	26.0921	6.4	590	-4.75
747	21	Female	Myopia	25.2999	6.2	576	-2.5
748	21	Female	Myopia	24.602	7.3	558	-0.75
749	21	Female	Myopia	24.5716	6.9	554	-0.75
750	21	Female	Myopia	25.1501	7.2	558	-2.25
751	21	Female	Myopia	24.9751	7.3	558	-1.75
752	21	Female	Myopia	25.2997	6.4	582	-2.5
753	21	Female	Myopia	24.9371	6.7	558	-1.75
754	21	Female	Myopia	25.4342	7.4	574	-3
755	21	Female	Myopia	24.9045	7.3	542	-1.5
756	21	Female	Myopia	25.1476	6.6	564	-2.25
757	21	Female	Myopia	25.4324	6.8	558	-3
758	21	Female	Myopia	24.9726	6.5	558	-1.75
759	21	Female	Myopia	26.49	7.4	590	-5.75
760	21	Female	Myopia	24.644	7.2	572	-1
761	21	Female	Myopia	25.2232	6.2	558	-2.5
762	21	Female	Myopia	25.0674	6.8	558	-2
763	21	Female	Myopia	25.7796	7.3	580	-4
764	21	Female	Myopia	24.7285	6.7	558	-1
765	21	Female	Myopia	25.5979	7	576	-3.5
766	21	Female	Myopia	24.8801	7	570	-1.5
767	21	Female	Myopia	24.8407	7.3	568	-1.5
768	21	Female	Myopia	25.503	7.1	562	-3.25
769	21	Female	Myopia	25.399	7.4	558	-3
770	21	Female	Myopia	24.931	6.3	558	-1.75
771	21	Female	Myopia	25.0816	7.1	568	-2
772	21	Female	Myopia	26.59	6.7	582	-6
773	21	Female	Myopia	24.49	7.1	558	-0.5
774	21	Female	Myopia	25.3546	7.3	562	-2.75
775	21	Female	Myopia	25.1135	7.3	574	-2.25
776	21	Female	Myopia	24.6857	6.8	548	-1
777	21	Female	Myopia	25.6387	6.8	580	-3.5
778	21	Female	Myopia	25.1782	7.1	550	-2.25
779	21	Female	Myopia	24.7691	6.9	568	-1.25
780	21	Female	Myopia	24.6095	6.9	556	-0.75
781	21	Female	Myopia	24.6848	7.2	558	-1
782	21	Female	Myopia	25.2834	7.4	558	-2.5
783	21	Female	Myopia	25.778	6.3	558	-3.75
784	21	Female	Myopia	25.3704	7.4	560	-2.75
785	21	Female	Myopia	25.1647	7.1	558	-2.25
786	21	Female	Myopia	24.6226	6.9	558	-0.75
787	20	Male	Myopia	24.862	6.7	558	-1.75
788	20	Male	Myopia	25.2493	7.2	596	-2.75
789	20	Male	Myopia	25.1773	7.1	558	-2.5
790	20	Male	Myopia	24.7219	7.3	570	-1.25
791	20	Male	Myopia	25.1181	7.1	558	-2.5
792	20	Male	Myopia	24.4	7	558	-0.5
793	20	Male	Myopia	25.1309	7.3	560	-2.5
794	20	Male	Myopia	24.4	7	558	-0.5
795	20	Male	Myopia	24.7409	7.4	556	-1.5
796	20	Male	Myopia	25.3973	7.2	574	-3
797	20	Male	Myopia	25.5295	6.5	570	-3.5
798	20	Male	Myopia	24.496	7.4	560	-0.75
799	20	Male	Myopia	25.32	7.4	570	-3
800	20	Male	Myopia	24.4727	6.9	562	-0.75
801	20	Male	Myopia	24.9254	6.6	558	-2
802	20	Male	Myopia	25.318	7.5	586	-3
803	20	Male	Myopia	25.1245	6.2	586	-2.5
804	20	Male	Myopia	25.6079	7.2	572	-3.75
805	20	Male	Myopia	24.7167	7	558	-1.25
806	20	Male	Myopia	26	6.7	595	-5.75
807	20	Male	Myopia	24.4	6.3	558	-0.5
808	20	Male	Myopia	24.8621	6.8	558	-1.75
809	20	Male	Myopia	25.3519	6.6	584	-3
810	20	Male	Myopia	25.2196	7.1	580	-2.75
811	20	Male	Myopia	24.8269	6.7	558	-1.5
812	20	Male	Myopia	24.8564	7	558	-1.75
813	20	Male	Myopia	25.8138	6.8	575	-4.25
814	20	Male	Myopia	25.1481	7.5	546	-2.5
815	20	Male	Myopia	25.5392	6.1	570	-3.5
816	20	Male	Myopia	25.4591	7.3	596	-3.25
817	20	Male	Myopia	24.5994	6.8	558	-1
818	20	Male	Myopia	24.7621	7.4	556	-1.5
819	20	Male	Myopia	25.5074	6.7	570	-3.5
820	20	Male	Myopia	25.2421	6.4	558	-2.75
821	20	Male	Myopia	25.4772	7.3	584	-3.25
822	20	Male	Myopia	26.1354	7.5	592	-5
823	20	Male	Myopia	24.963	6.9	558	-2
824	20	Male	Myopia	25.3011	6.5	558	-2.75
825	20	Male	Myopia	25.1013	6.2	574	-2.25
826	20	Male	Myopia	25.0615	6.6	558	-2.25
827	20	Male	Myopia	24.9851	6.1	566	-2
828	20	Male	Myopia	25.1762	6.4	544	-2.5
829	20	Male	Myopia	25.2884	7.3	596	-2.75
830	20	Male	Myopia	24.9524	7.3	558	-2
831	20	Male	Myopia	24.6666	6.5	557	-1.25
832	20	Male	Myopia	24.7082	7.4	564	-1.25
833	20	Male	Myopia	25.2699	6.7	558	-2.75
834	20	Male	Myopia	25.1077	6.6	558	-2.25
835	20	Male	Myopia	25.148	7	550	-2.5
836	20	Male	Myopia	24.9306	6.4	557	-2
837	20	Male	Myopia	24.4	7.1	557	-0.5
838	20	Male	Myopia	24.9036	6.2	557	-1.75
839	20	Male	Myopia	26	6.8	612	-5.5
840	20	Male	Myopia	24.7176	7	557	-1.25
841	20	Male	Myopia	24.4	7.4	572	-0.5
842	20	Male	Myopia	24.9207	6.4	548	-1.75
843	20	Male	Myopia	24.9613	6.9	568	-2
844	20	Male	Myopia	25.2835	6.9	570	-2.75
845	20	Male	Myopia	25.5941	6.8	570	-3.75
846	20	Male	Myopia	26	6.3	610	-5.75
847	20	Male	Myopia	24.9362	6.7	557	-2
848	20	Male	Myopia	25.2415	7.4	570	-2.75
849	20	Male	Myopia	24.9791	6.3	558	-2
850	20	Male	Myopia	24.7755	6.1	557	-1.5
851	20	Male	Myopia	24.8363	7.2	570	-1.75
852	20	Male	Myopia	24.8993	6.9	557	-1.75
853	20	Male	Myopia	25.1216	6.8	544	-2.5
854	20	Male	Myopia	24.6391	7	557	-1.25
855	20	Male	Myopia	25.1962	7.3	570	-2.5
856	20	Male	Myopia	24.8105	7	560	-1.5
857	20	Male	Myopia	25.471	7.4	596	-3.25
858	20	Male	Myopia	24.9869	7.4	578	-2
859	20	Male	Myopia	24.9234	6.6	557	-1.75
860	20	Male	Myopia	26	7.2	600	-5
861	20	Male	Myopia	24.4154	7.2	554	-0.5
862	20	Male	Myopia	24.7721	7.3	568	-1.5
863	20	Male	Myopia	24.6017	7.3	546	-1
864	20	Male	Myopia	25.0557	6.9	558	-2.25
865	20	Male	Myopia	25.3775	7.5	570	-3
866	20	Male	Myopia	24.9983	6.9	582	-2
867	20	Male	Myopia	25.0817	7.5	542	-2.25
868	20	Male	Myopia	25.5152	6.6	550	-3.5
869	20	Male	Myopia	24.4971	7.1	562	-0.75
870	20	Male	Myopia	24.7806	7.1	557	-1.5
871	20	Male	Myopia	24.4855	7	557	-0.75
872	20	Male	Myopia	24.9758	6.3	546	-2
873	20	Male	Myopia	26	7.2	596	-5.75
874	20	Male	Myopia	24.7805	7	557	-1.5
875	20	Male	Myopia	25.5505	7.3	570	-3.5
876	20	Male	Myopia	25.4744	7.2	570	-3.25
877	20	Male	Myopia	24.6858	6.2	557	-1.25
878	20	Male	Myopia	25.5698	7.4	570	-3.5
879	20	Male	Myopia	25.0595	7.2	558	-2.25
880	20	Male	Myopia	25.672	6.3	556	-3.75
881	20	Male	Myopia	24.584	7.5	557	-1
882	20	Male	Myopia	24.8833	7	557	-1.75
883	21	Male	Myopia	25.5707	6.5	570	-3.5
884	21	Male	Myopia	24.712	7.1	570	-1.25
885	21	Male	Myopia	25.1175	6.4	585	-2.5
886	21	Male	Myopia	24.8443	7	557	-1.75
887	21	Male	Myopia	24.4029	6.7	562	-0.5
888	21	Male	Myopia	24.8678	6.1	558	-1.75
889	21	Male	Myopia	25.2355	6.4	580	-2.75
890	21	Male	Myopia	24.7165	6.6	566	-1.25
891	21	Male	Myopia	25.1028	6.2	566	-2.25
892	21	Male	Myopia	25.7382	7.2	584	-4
893	21	Male	Myopia	25.4203	6.7	558	-3.25
894	21	Male	Myopia	25.1881	6.5	574	-2.5
895	21	Male	Myopia	24.8197	6.7	560	-1.5
896	21	Male	Myopia	25.167	6.5	566	-2.5
897	21	Male	Myopia	25.5416	6.7	548	-3.5
898	21	Male	Myopia	25.0366	6.2	544	-2.25
899	21	Male	Myopia	25.3318	6.4	570	-3
900	21	Male	Myopia	24.5062	6.7	557	-0.75
901	21	Male	Myopia	24.7572	7.2	557	-1.5
902	21	Male	Myopia	25.5885	7.3	558	-3.5
903	21	Male	Myopia	25.217	6.8	548	-2.75
904	21	Male	Myopia	24.9197	6.3	557	-1.75
905	21	Male	Myopia	25.3186	7.2	570	-3
906	21	Male	Myopia	25.5729	7.3	596	-3.5
907	21	Male	Myopia	24.607	6.3	557	-1
908	21	Male	Myopia	24.8096	6.5	557	-1.5
909	21	Male	Myopia	24.873	7	557	-1.75
910	21	Male	Myopia	24.7232	6.8	557	-1.25
911	21	Male	Myopia	24.598	7	546	-1
912	21	Male	Myopia	25.2952	6.2	588	-2.75
913	21	Male	Myopia	24.9404	6.8	570	-2
914	21	Male	Myopia	25.0365	6.5	558	-2.25
915	21	Male	Myopia	24.5452	6.4	570	-1
916	21	Male	Myopia	24.9098	6.4	557	-1.75
917	21	Male	Myopia	24.5423	7.3	557	-0.75
918	21	Male	Myopia	25.1209	6.8	558	-2.5
919	21	Male	Myopia	24.8457	6.4	557	-1.75
920	21	Male	Myopia	24.5353	7.5	557	-0.75
921	21	Male	Myopia	25.5342	6.1	570	-3.5
922	21	Male	Myopia	24.7178	7.5	557	-1.25
923	21	Male	Myopia	25.4226	7.2	570	-3.25
924	21	Male	Myopia	24.9311	7.3	555	-2
925	21	Male	Myopia	25.0874	6.2	558	-2.25
926	21	Male	Myopia	25.2471	6.9	558	-2.75
927	21	Male	Myopia	25.1052	6.2	558	-2.25
928	21	Male	Myopia	24.4	6.1	555	-0.5
929	21	Male	Myopia	25.0867	7	566	-2.25
930	21	Male	Myopia	25.1197	6.3	542	-2.5
931	21	Male	Myopia	25.3497	7.3	586	-3
932	21	Male	Myopia	25.2659	6.4	558	-2.75
933	21	Male	Myopia	24.8468	7	560	-1.75
934	21	Male	Myopia	24.6969	6.2	555	-1.25
935	21	Male	Myopia	25.0323	6.7	558	-2.25
936	21	Male	Myopia	25.0348	7	558	-2.25
937	21	Male	Myopia	25.0692	7.5	558	-2.25
938	21	Male	Myopia	25.206	6.5	588	-2.5
939	21	Male	Myopia	25.3539	6.3	570	-3
940	21	Male	Myopia	24.5964	6.8	555	-1
941	21	Male	Myopia	24.8862	6.1	570	-1.75
942	21	Male	Myopia	25.85	6.6	558	-4.25
943	21	Male	Myopia	25.2856	7	558	-2.75
944	21	Male	Myopia	24.7265	7.4	555	-1.25
945	21	Male	Myopia	24.8276	6.4	572	-1.5
946	21	Male	Myopia	25.0936	7.4	558	-2.25
947	21	Male	Myopia	25.0587	7	546	-2.25
948	21	Male	Myopia	25.2811	7.5	556	-2.75
949	21	Male	Myopia	24.5472	7	555	-1
950	21	Male	Myopia	25.3807	6.8	570	-3
951	21	Male	Myopia	24.4273	6.4	555	-0.5
952	21	Male	Myopia	25.2652	7	558	-2.75
953	21	Male	Myopia	25.1469	7.4	546	-2.5
954	21	Male	Myopia	24.5787	6.8	555	-1
955	21	Male	Myopia	25.2494	7	558	-2.75
956	21	Male	Myopia	24.9405	7.3	555	-2
957	21	Male	Myopia	25.0326	6.8	558	-2.25
958	21	Male	Myopia	25.1903	6.7	576	-2.5
959	21	Male	Myopia	24.7164	6.6	544	-1.25
960	21	Male	Myopia	25.6944	6.2	580	-4
961	21	Male	Myopia	25.5999	7.4	580	-3.75
962	21	Male	Myopia	25.315	6.9	570	-3
963	21	Male	Myopia	25.2093	6.7	558	-2.5
964	21	Male	Myopia	24.8093	7	570	-1.5
965	21	Male	Myopia	25.0917	6.3	562	-2.25
966	21	Male	Myopia	25.4103	7.4	584	-3.25
967	21	Male	Myopia	24.574	6.1	570	-1
968	21	Male	Myopia	24.7703	7.5	570	-1.5
969	21	Male	Myopia	25.5179	7.1	570	-3.5
970	21	Male	Myopia	24.8426	7.4	570	-1.75
971	21	Male	Myopia	24.6917	6.6	570	-1.25
972	21	Male	Myopia	26.2	6.3	620	-6
973	21	Male	Myopia	24.8315	7.1	555	-1.75
974	21	Male	Myopia	25.0806	7.5	558	-2.25
975	21	Male	Myopia	24.5002	7.2	570	-0.75
976	21	Male	Myopia	24.4	6.4	555	-0.5
977	21	Male	Myopia	25.5068	7	572	-3.5
978	21	Male	Myopia	25.2063	6.8	570	-2.5
979	21	Male	Myopia	25.4445	7.2	570	-3.25
980	21	Male	Myopia	25.0951	7.4	565	-2.25
981	21	Male	Myopia	25.5239	6.9	586	-3.5
982	21	Male	Myopia	24.4713	6.1	555	-0.75
983	21	Male	Myopia	25.0771	7.4	546	-2.25
984	21	Male	Myopia	24.6617	6.9	560	-1.25
985	21	Male	Myopia	25.2113	6.2	570	-2.5
986	21	Male	Myopia	24.7238	7.5	566	-1.25
987	21	Male	Myopia	25.0864	6.4	560	-2.25
988	21	Male	Myopia	25.1982	7.4	558	-2.5
989	21	Male	Myopia	25.1168	6.7	580	-2.5
990	21	Male	Myopia	25.7245	7.3	580	-4
991	21	Male	Myopia	25.3176	7.1	554	-3
992	21	Male	Myopia	25.1109	7.4	558	-2.25
993	21	Male	Myopia	25.0355	7	558	-2.25
994	21	Male	Myopia	24.5146	6.5	555	-0.75
995	22	Female	Myopia	25.0467	7.57	561	-2
996	22	Female	Myopia	24.7471	6.77	573	-1.25
997	22	Female	Myopia	25.7271	7.57	583	-3.75
998	22	Female	Myopia	25.4678	7.47	561	-3
999	22	Female	Myopia	25.3559	7.67	571	-2.75
1000	22	Female	Myopia	25.127	6.37	589	-2.25
1001	22	Female	Myopia	25.3763	6.87	567	-2.75
1002	22	Female	Myopia	24.6217	6.37	563	-0.75
1003	22	Female	Myopia	25.5443	7.07	565	-3.25
1004	22	Female	Myopia	24.8882	6.27	558	-1.5
1005	22	Female	Myopia	25.0455	7.27	561	-2
1006	22	Female	Myopia	25.1879	7.67	561	-2.25
1007	22	Female	Myopia	24.6883	6.27	573	-1
1008	22	Female	Myopia	24.6966	7.17	575	-1
1009	22	Female	Myopia	25.1345	7.07	561	-2.25
1010	22	Female	Myopia	24.9176	6.47	558	-1.5
1011	22	Female	Myopia	25.0431	7.17	567	-2
1012	22	Female	Myopia	25.5848	7.37	579	-3.25
1013	22	Female	Myopia	25.7496	7.67	561	-3.75
1014	22	Female	Myopia	24.9308	6.47	547	-1.75
1015	22	Female	Myopia	25.9361	6.37	561	-4.25
1016	22	Female	Myopia	24.7537	6.47	549	-1.25
1017	22	Female	Myopia	25.0246	6.87	567	-2
1018	22	Female	Myopia	24.945	7.47	569	-1.75
1019	22	Female	Myopia	25.2418	7.37	551	-2.5
1020	22	Female	Myopia	24.8352	7.47	558	-1.5
1021	22	Female	Myopia	25.0383	6.27	561	-2
1022	22	Female	Myopia	24.49	7.57	558	-0.5
1023	22	Female	Myopia	25.5573	7.37	559	-3.25
1024	22	Female	Myopia	25.0235	7.57	563	-2
1025	22	Female	Myopia	25.2682	6.57	587	-2.5
1026	22	Female	Myopia	25.5344	7.07	561	-3.25
1027	22	Female	Myopia	25.3079	6.97	561	-2.75
1028	22	Female	Myopia	25.85	7.27	578	-4.5
1029	22	Female	Myopia	25.0833	6.47	561	-2
1030	22	Female	Myopia	24.7687	6.77	559	-1.25
1031	22	Female	Myopia	24.49	6.67	558	-0.5
1032	22	Female	Myopia	24.9738	7.07	561	-1.75
1033	22	Female	Myopia	25.8885	7.07	591	-4.25
1034	22	Female	Myopia	25.2114	7.57	561	-2.5
1035	22	Female	Myopia	25.451	7.07	569	-3
1036	22	Female	Myopia	25.8103	6.27	593	-4
1037	22	Female	Myopia	25.1671	7.27	561	-2.25
1038	22	Female	Myopia	24.8907	6.57	571	-1.5
1039	22	Female	Myopia	24.6002	6.87	558	-0.75
1040	22	Female	Myopia	25.9389	6.97	593	-4.25
1041	22	Female	Myopia	24.8638	6.97	577	-1.5
1042	22	Female	Myopia	25.5913	7.17	561	-3.5
1043	22	Female	Myopia	24.7205	6.77	558	-1
1044	22	Female	Myopia	25.4258	7.67	561	-3
1045	22	Female	Myopia	25.1637	7.07	583	-2.25
1046	22	Female	Myopia	25.8	7.27	578	-4.5
1047	22	Female	Myopia	25.3566	7.17	599	-2.75
1048	22	Female	Myopia	25.157	6.37	569	-2.25
1049	22	Female	Myopia	25.6788	7.17	561	-3.5
1050	22	Female	Myopia	25.1366	6.97	561	-2.25
1051	22	Female	Myopia	25.2315	7.17	553	-2.5
1052	22	Female	Myopia	25.6566	7.47	579	-3.5
1053	22	Female	Myopia	25.1431	7.67	561	-2.25
1054	22	Female	Myopia	25.3671	6.97	569	-2.75
1055	22	Female	Myopia	24.6656	7.57	558	-1
1056	22	Female	Myopia	25.9579	6.37	578	-4.25
1057	22	Female	Myopia	25.599	6.37	569	-3.5
1058	22	Female	Myopia	24.6865	6.67	558	-1
1059	22	Female	Myopia	24.9056	7.07	573	-1.5
1060	22	Female	Myopia	25.5313	6.37	561	-3.25
1061	22	Female	Myopia	24.5969	6.37	551	-0.75
1062	22	Female	Myopia	24.9677	6.47	558	-1.75
1063	22	Female	Myopia	24.49	6.57	558	-0.5
1064	22	Female	Myopia	25.3563	7.57	561	-2.75
1065	22	Female	Myopia	24.6738	6.67	558	-1
1066	22	Female	Myopia	26.1128	6.47	593	-4.75
1067	22	Female	Myopia	24.8271	7.67	558	-1.5
1068	22	Female	Myopia	24.6175	7.07	558	-0.75
1069	22	Female	Myopia	24.9436	6.67	567	-1.75
1070	22	Female	Myopia	24.8619	7.47	558	-1.5
1071	22	Female	Myopia	25.4794	6.57	545	-3
1072	22	Female	Myopia	25.0714	6.37	559	-2
1073	22	Female	Myopia	25.1165	6.27	561	-2.25
1074	22	Female	Myopia	24.6383	6.77	558	-1
1075	22	Female	Myopia	24.8279	6.57	558	-1.5
1076	22	Female	Myopia	24.629	6.67	558	-0.75
1077	22	Female	Myopia	25.1065	6.27	549	-2
1078	22	Female	Myopia	25.151	7.17	561	-2.25
1079	22	Female	Myopia	25.1778	6.37	561	-2.25
1080	22	Female	Myopia	25.7382	6.37	573	-3.75
1081	22	Female	Myopia	24.9298	7.57	565	-1.75
1082	22	Female	Myopia	25.2109	6.77	561	-2.5
1083	22	Female	Myopia	25.3551	6.57	563	-2.75
1084	23	Female	Myopia	25.0146	6.27	561	-1.75
1085	23	Female	Myopia	25.0359	6.47	561	-2
1086	23	Female	Myopia	24.9726	6.27	569	-1.75
1087	23	Female	Myopia	24.9063	6.27	559	-1.5
1088	23	Female	Myopia	24.9013	6.97	577	-1.5
1089	23	Female	Myopia	25.1413	7.67	569	-2.25
1090	23	Female	Myopia	25.0453	6.77	551	-2
1091	23	Female	Myopia	24.8463	7.47	573	-1.5
1092	23	Female	Myopia	25.3102	7.07	569	-2.75
1093	23	Female	Myopia	24.7884	7.17	558	-1.25
1094	23	Female	Myopia	24.6287	6.67	558	-0.75
1095	23	Female	Myopia	25.3237	6.67	573	-2.75
1096	23	Female	Myopia	25.0683	7.27	579	-2
1097	23	Female	Myopia	25.7076	6.77	569	-3.75
1098	23	Female	Myopia	25.4796	6.47	569	-3
1099	23	Female	Myopia	25.4292	6.77	569	-3
1100	23	Female	Myopia	25.1855	6.27	569	-2.25
1101	23	Female	Myopia	25.4002	6.47	555	-3
1102	23	Female	Myopia	24.8428	6.87	558	-1.5
1103	23	Female	Myopia	25.2437	7.27	569	-2.5
1104	23	Female	Myopia	25.2576	6.97	569	-2.5
1105	23	Female	Myopia	25.2411	6.27	569	-2.5
1106	23	Female	Myopia	25.1579	7.17	569	-2.25
1107	23	Female	Myopia	25.4354	7.67	569	-3
1108	23	Female	Myopia	25.2004	7.47	569	-2.25
1109	23	Female	Myopia	25.017	6.77	569	-2
1110	23	Female	Myopia	25.6703	7.17	565	-3.5
1111	23	Female	Myopia	24.9845	7.37	573	-1.75
1112	23	Female	Myopia	25.0966	6.97	569	-2
1113	23	Female	Myopia	25.932	6.97	578	-4.25
1114	23	Female	Myopia	25.0295	7.37	569	-2
1115	23	Female	Myopia	25.047	7.27	569	-2
1116	23	Female	Myopia	25.2267	7.57	583	-2.5
1117	23	Female	Myopia	25.2975	6.37	569	-2.5
1118	23	Female	Myopia	25.6977	6.27	583	-3.75
1119	23	Female	Myopia	24.5948	7.17	547	-0.75
1120	23	Female	Myopia	25.3172	6.67	565	-2.75
1121	23	Female	Myopia	25.8927	7.27	578	-4.25
1122	23	Female	Myopia	25.0666	6.77	573	-2
1123	23	Female	Myopia	24.7387	7.27	558	-1.25
1124	23	Female	Myopia	25.3254	6.47	569	-2.75
1125	23	Female	Myopia	25.0654	6.77	559	-2
1126	23	Female	Myopia	25.0137	7.37	569	-1.75
1127	23	Female	Myopia	25.9019	7.37	551	-4.25
1128	23	Female	Myopia	24.959	7.17	579	-1.75
1129	23	Female	Myopia	25.1373	7.47	569	-2.25
1130	23	Female	Myopia	24.66	6.57	558	-1
1131	23	Female	Myopia	24.9995	6.57	569	-1.75
1132	23	Female	Myopia	24.9222	7.57	573	-1.75
1133	23	Female	Myopia	25.3681	7.47	581	-2.75
1134	23	Female	Myopia	25.4415	7.27	569	-3
1135	23	Female	Myopia	25.1	7.07	569	-2
1136	23	Female	Myopia	25.4746	7.07	551	-3
1137	23	Female	Myopia	25.5624	7.17	569	-3.25
1138	23	Female	Myopia	25.4533	6.67	567	-3
1139	23	Female	Myopia	24.7384	7.67	558	-1.25
1140	23	Female	Myopia	24.7501	7.67	558	-1.25
1141	23	Female	Myopia	25.9755	7.67	578	-4.5
1142	23	Female	Myopia	24.5891	6.67	567	-0.75
1143	23	Female	Myopia	25.3524	6.37	569	-2.75
1144	23	Female	Myopia	26.19	7.67	593	-5
1145	23	Female	Myopia	24.8946	6.57	558	-1.5
1146	23	Female	Myopia	24.6971	7.67	568	-1
1147	23	Female	Myopia	25.5856	7.07	575	-3.25
1148	23	Female	Myopia	25.2973	7.07	569	-2.5
1149	23	Female	Myopia	26.29	6.47	593	-5.25
1150	23	Female	Myopia	25.0986	6.27	569	-2
1151	23	Female	Myopia	25.0961	6.27	549	-2
1152	23	Female	Myopia	25.6519	6.67	581	-3.5
1153	23	Female	Myopia	25.2603	7.07	569	-2.5
1154	23	Female	Myopia	24.4923	7.07	563	-0.5
1155	23	Female	Myopia	25.4331	7.07	569	-3
1156	23	Female	Myopia	24.8188	7.37	573	-1.25
1157	23	Female	Myopia	25.6885	6.97	565	-3.75
1158	23	Female	Myopia	25.2071	6.77	569	-2.5
1159	23	Female	Myopia	24.7828	6.97	573	-1.25
1160	23	Female	Myopia	24.5717	7.47	547	-0.75
1161	23	Female	Myopia	24.49	6.27	573	-0.5
1162	23	Female	Myopia	25.2987	7.67	569	-2.5
1163	23	Female	Myopia	24.7506	6.57	573	-1.25
1164	23	Female	Myopia	25.3009	6.77	569	-2.5
1165	23	Female	Myopia	24.8352	7.47	555	-1.5
1166	23	Female	Myopia	24.49	6.87	555	-0.5
1167	23	Female	Myopia	24.6553	7.27	558	-1
1168	23	Female	Myopia	25.0218	6.37	569	-2
1169	23	Female	Myopia	25.49	7.37	551	-3
1170	23	Female	Myopia	25.4384	7.27	569	-3
1171	23	Female	Myopia	25.1844	6.47	561	-2.25
1172	23	Female	Myopia	25.1517	6.87	553	-2.25
1173	23	Female	Myopia	25.0719	7.27	569	-2
1174	23	Female	Myopia	24.653	7.57	558	-1
1175	23	Female	Myopia	25.2965	6.87	579	-2.5
1176	22	Male	Myopia	24.4483	6.8	547	-0.75
1177	22	Male	Myopia	24.965	6.2	579	-2
1178	22	Male	Myopia	24.7961	7.2	552	-1.5
1179	22	Male	Myopia	25.0119	6.6	563	-2
1180	22	Male	Myopia	25.4886	6.3	579	-3.25
1181	22	Male	Myopia	24.6898	6.8	552	-1.25
1182	22	Male	Myopia	26.3	6.9	587	-5.5
1183	22	Male	Myopia	25.1076	6.3	579	-2.25
1184	22	Male	Myopia	25.051	7.1	563	-2.25
1185	22	Male	Myopia	24.5418	7.3	545	-0.75
1186	22	Male	Myopia	25.2272	7.3	563	-2.75
1187	22	Male	Myopia	25.8	7.1	577	-4.75
1188	22	Male	Myopia	24.582	7	561	-1
1189	22	Male	Myopia	25.3543	6.7	563	-3
1190	22	Male	Myopia	24.431	7	557	-0.5
1191	22	Male	Myopia	24.8118	7.1	552	-1.5
1192	22	Male	Myopia	25.2272	7.5	567	-2.75
1193	22	Male	Myopia	24.5478	7	547	-1
1194	22	Male	Myopia	24.6253	6.8	552	-1
1195	22	Male	Myopia	24.8369	6.9	567	-1.75
1196	22	Male	Myopia	25.1814	6.5	563	-2.5
1197	22	Male	Myopia	24.8087	7.2	552	-1.5
1198	22	Male	Myopia	24.7426	7	567	-1.5
1199	22	Male	Myopia	25.6507	7.3	563	-3.75
1200	22	Male	Myopia	24.9685	7.4	563	-2
1201	22	Male	Myopia	24.7663	6.5	552	-1.5
1202	22	Male	Myopia	25.0509	6.4	563	-2.25
1203	22	Male	Myopia	24.7709	6.9	552	-1.5
1204	22	Male	Myopia	24.9965	6.1	559	-2
1205	22	Male	Myopia	25.6213	7.1	547	-3.75
1206	22	Male	Myopia	25.3282	7.2	551	-3
1207	22	Male	Myopia	25.004	6.2	563	-2
1208	22	Male	Myopia	25.9568	7.4	563	-4.5
1209	22	Male	Myopia	25.094	6.6	569	-2.25
1210	22	Male	Myopia	24.9813	7.5	563	-2
1211	22	Male	Myopia	24.5763	6.9	552	-1
1212	22	Male	Myopia	25.8	6.4	577	-4.75
1213	22	Male	Myopia	24.6454	6.9	547	-1.25
1214	22	Male	Myopia	24.6651	6.6	561	-1.25
1215	22	Male	Myopia	24.4891	6.8	561	-0.75
1216	22	Male	Myopia	25.4218	6.8	579	-3.25
1217	22	Male	Myopia	25.3652	6.6	579	-3
1218	22	Male	Myopia	25.5346	7.4	563	-3.5
1219	22	Male	Myopia	25.0951	6.4	569	-2.25
1220	22	Male	Myopia	25.3781	6.1	563	-3
1221	22	Male	Myopia	24.4	7.5	591	-0.5
1222	22	Male	Myopia	24.9663	6.9	563	-2
1223	22	Male	Myopia	24.9892	7.5	563	-2
1224	22	Male	Myopia	25.1217	7.1	563	-2.5
1225	22	Male	Myopia	25.0267	6.7	563	-2.25
1226	22	Male	Myopia	24.9977	6.2	557	-2
1227	22	Male	Myopia	25.0527	7.4	563	-2.25
1228	22	Male	Myopia	24.8416	7.3	552	-1.75
1229	22	Male	Myopia	24.7914	7.3	567	-1.5
1230	22	Male	Myopia	25.1744	7.2	563	-2.5
1231	22	Male	Myopia	25.7623	6.2	539	-4
1232	22	Male	Myopia	24.6147	6.5	567	-1
1233	22	Male	Myopia	25.3304	7.5	563	-3
1234	22	Male	Myopia	25.1282	6.2	563	-2.5
1235	22	Male	Myopia	25.2251	6.6	569	-2.75
1236	22	Male	Myopia	25.6323	6.1	563	-3.75
1237	22	Male	Myopia	25.1739	6.8	563	-2.5
1238	23	Male	Myopia	24.8347	6.6	552	-1.75
1239	23	Male	Myopia	25.4288	6.1	563	-3.25
1240	23	Male	Myopia	25.8	6.5	543	-5.5
1241	23	Male	Myopia	25.0239	6.4	563	-2.25
1242	23	Male	Myopia	24.7655	7.3	572	-1.5
1243	23	Male	Myopia	25.0863	7.1	561	-2.25
1244	23	Male	Myopia	24.8599	7	541	-1.75
1245	23	Male	Myopia	25.6657	6.7	563	-3.75
1246	23	Male	Myopia	25.0519	6.5	563	-2.25
1247	23	Male	Myopia	25.2069	7.4	563	-2.5
1248	23	Male	Myopia	25.3389	6.8	555	-3
1249	23	Male	Myopia	25.5082	7.4	571	-3.5
1250	23	Male	Myopia	24.4934	6.8	557	-0.75
1251	23	Male	Myopia	24.7716	6.1	563	-1.5
1252	23	Male	Myopia	25.319	6.6	553	-3
1253	23	Male	Myopia	25.1149	6.6	579	-2.25
1254	23	Male	Myopia	25.3602	7.4	563	-3
1255	23	Male	Myopia	24.7881	6.8	552	-1.5
1256	23	Male	Myopia	24.4	6.5	585	-0.5
1257	23	Male	Myopia	25.184	6.1	563	-2.5
1258	23	Male	Myopia	25.034	6.6	563	-2.25
1259	23	Male	Myopia	24.7409	6.9	561	-1.5
1260	23	Male	Myopia	25.1966	7.5	563	-2.5
1261	23	Male	Myopia	24.4	6.2	555	-0.5
1262	23	Male	Myopia	25.0859	7	563	-2.25
1263	23	Male	Myopia	24.924	6.7	567	-1.75
1264	23	Male	Myopia	25.2985	7.2	563	-2.75
1265	23	Male	Myopia	25.1369	6.8	563	-2.5
1266	23	Male	Myopia	24.8399	6.9	549	-1.75
1267	23	Male	Myopia	25.4572	6.4	563	-3.25
1268	23	Male	Myopia	24.8896	6.4	567	-1.75
1269	23	Male	Myopia	24.7	6.6	559	-1.25
1270	23	Male	Myopia	25.1371	6.2	563	-2.5
1271	23	Male	Myopia	24.96	7.5	563	-2
1272	23	Male	Myopia	24.9722	6.6	563	-2
1273	23	Male	Myopia	24.7668	6.7	552	-1.5
1274	23	Male	Myopia	25.3482	6.9	559	-3
1275	23	Male	Myopia	24.8412	7.3	567	-1.75
1276	23	Male	Myopia	25.1294	7.3	563	-2.5
1277	23	Male	Myopia	25.03	7.3	563	-2.25
1278	23	Male	Myopia	24.4	6.9	552	-0.5
1279	23	Male	Myopia	24.9101	6.7	553	-1.75
1280	23	Male	Myopia	24.4	6.9	557	-0.5
1281	23	Male	Myopia	25.3371	6.8	572	-3
1282	23	Male	Myopia	24.7061	7	567	-1.25
1283	23	Male	Myopia	25.3673	6.2	545	-3
1284	23	Male	Myopia	25.5195	6.9	555	-3.5
1285	23	Male	Myopia	25.0763	7.3	567	-2.25
1286	23	Male	Myopia	24.5187	7.4	557	-0.75
1287	23	Male	Myopia	24.4	6.8	547	-0.5
1288	23	Male	Myopia	24.8585	6.1	575	-1.75
1289	23	Male	Myopia	25.064	6.4	557	-2.25
1290	23	Male	Myopia	24.5604	6.9	557	-1
1291	23	Male	Myopia	25.8	7.2	587	-5
1292	23	Male	Myopia	24.8828	6.8	557	-1.75
1293	23	Male	Myopia	24.7416	7	557	-1.5
1294	23	Male	Myopia	25.8345	7.2	587	-4.25
1295	23	Male	Myopia	25.8427	6.7	541	-4.25
1296	23	Male	Myopia	25.3839	6.2	579	-3
1297	23	Male	Myopia	25.2225	6.5	567	-2.75
1298	23	Male	Myopia	24.6615	6.4	552	-1.25
1299	23	Male	Myopia	25.7427	6.7	555	-4
1300	23	Male	Myopia	24.891	7.4	552	-1.75
1301	23	Male	Myopia	24.9387	6.7	567	-2
1302	24	Female	Myopia	25.3167	7.27	571	-2.75
1303	24	Female	Myopia	25.5484	7.47	553	-3.25
1304	24	Female	Myopia	25.0997	6.37	573	-2
1305	24	Female	Myopia	25.447	7.57	573	-3
1306	24	Female	Myopia	24.8571	6.37	567	-1.5
1307	24	Female	Myopia	25.5254	6.87	573	-3.25
1308	24	Female	Myopia	24.9657	7.07	573	-1.75
1309	24	Female	Myopia	25.0773	7.17	573	-2
1310	24	Female	Myopia	25.9724	7.07	585	-4.5
1311	24	Female	Myopia	24.8977	7.57	558	-1.5
1312	24	Female	Myopia	25.0979	6.67	557	-2
1313	24	Female	Myopia	25.0709	7.07	573	-2
1314	24	Female	Myopia	25.0393	6.97	573	-2
1315	24	Female	Myopia	24.49	6.77	563	-0.5
1316	24	Female	Myopia	25.1682	7.07	573	-2.25
1317	24	Female	Myopia	25.0802	6.97	573	-2
1318	24	Female	Myopia	25.4152	7.07	583	-3
1319	24	Female	Myopia	24.7608	7.47	558	-1.25
1320	24	Female	Myopia	25.2962	6.47	573	-2.5
1321	24	Female	Myopia	24.9747	6.47	577	-1.75
1322	24	Female	Myopia	24.5885	7.27	563	-0.75
1323	24	Female	Myopia	25.7615	6.87	589	-3.75
1324	24	Female	Myopia	24.7085	7.07	558	-1
1325	24	Female	Myopia	25.4779	6.47	573	-3
1326	24	Female	Myopia	24.8999	7.37	563	-1.5
1327	24	Female	Myopia	25.2367	6.37	583	-2.5
1328	24	Female	Myopia	25.2312	7.37	561	-2.5
1329	24	Female	Myopia	25.2415	6.87	573	-2.5
1330	24	Female	Myopia	24.8318	6.67	573	-1.5
1331	24	Female	Myopia	25.1053	7.47	587	-2
1332	24	Female	Myopia	24.6292	7.37	569	-0.75
1333	24	Female	Myopia	25.0442	6.77	555	-2
1334	24	Female	Myopia	24.8907	7.47	569	-1.5
1335	24	Female	Myopia	24.9312	7.57	558	-1.75
1336	24	Female	Myopia	26.29	7.47	593	-5.25
1337	24	Female	Myopia	24.6181	7.27	567	-0.75
1338	24	Female	Myopia	25.0636	7.57	553	-2
1339	24	Female	Myopia	24.7788	7.57	579	-1.25
1340	24	Female	Myopia	25.1356	7.37	573	-2.25
1341	24	Female	Myopia	24.9823	6.77	571	-1.75
1342	24	Female	Myopia	24.8426	7.37	573	-1.5
1343	24	Female	Myopia	25.5805	6.27	573	-3.25
1344	24	Female	Myopia	25.4198	7.47	567	-3
1345	24	Female	Myopia	25.1376	6.97	549	-2.25
1346	24	Female	Myopia	24.7548	7.47	557	-1.25
1347	24	Female	Myopia	24.7836	6.27	569	-1.25
1348	24	Female	Myopia	25.0101	7.17	573	-1.75
1349	24	Female	Myopia	25.721	7.37	573	-3.75
1350	24	Female	Myopia	24.7191	6.67	567	-1
1351	24	Female	Myopia	25.2907	7.27	581	-2.5
1352	24	Female	Myopia	24.7782	6.67	558	-1.25
1353	24	Female	Myopia	25.1124	7.57	547	-2.25
1354	24	Female	Myopia	24.5632	7.37	558	-0.75
1355	24	Female	Myopia	24.9213	7.57	558	-1.75
1356	24	Female	Myopia	24.9864	6.57	573	-1.75
1357	24	Female	Myopia	25.7414	6.97	583	-3.75
1358	24	Female	Myopia	25.2734	7.37	573	-2.5
1359	24	Female	Myopia	24.9866	6.97	573	-1.75
1360	24	Female	Myopia	25.0105	6.27	573	-1.75
1361	24	Female	Myopia	25.9476	6.77	593	-4.25
1362	24	Female	Myopia	25.4421	7.17	573	-3
1363	24	Female	Myopia	25.0431	6.97	573	-2
1364	24	Female	Myopia	25.2757	7.17	573	-2.5
1365	24	Female	Myopia	25.7968	6.87	583	-4
1366	24	Female	Myopia	25.2182	6.27	569	-2.5
1367	24	Female	Myopia	24.49	7.67	563	-0.5
1368	24	Female	Myopia	25.3426	7.67	585	-2.75
1369	24	Female	Myopia	24.783	6.77	568	-1.25
1370	24	Female	Myopia	24.728	7.67	568	-1
1371	24	Female	Myopia	25.0701	7.47	557	-2
1372	24	Female	Myopia	24.7245	7.37	573	-1
1373	24	Female	Myopia	25.2118	6.77	555	-2.5
1374	24	Female	Myopia	25.3887	6.27	573	-2.75
1375	24	Female	Myopia	25.6292	7.27	559	-3.5
1376	24	Female	Myopia	25.2759	7.57	573	-2.5
1377	24	Female	Myopia	24.8349	6.77	585	-1.5
1378	24	Female	Myopia	24.6969	7.07	567	-1
1379	24	Female	Myopia	24.6265	7.67	558	-0.75
1380	24	Female	Myopia	25.1343	6.77	573	-2.25
1381	24	Female	Myopia	25.6383	6.37	588	-3.5
1382	24	Female	Myopia	25.5797	6.67	583	-3.25
1383	24	Female	Myopia	25.2219	7.57	573	-2.5
1384	24	Female	Myopia	24.6071	6.57	558	-0.75
1385	24	Female	Myopia	25.2033	6.37	553	-2.25
1386	25	Female	Myopia	24.5013	7.07	558	-0.5
1387	25	Female	Myopia	24.9735	6.47	571	-1.75
1388	25	Female	Myopia	24.868	7.17	568	-1.5
1389	25	Female	Myopia	25.2847	6.47	583	-2.5
1390	25	Female	Myopia	25.1185	6.87	583	-2.25
1391	25	Female	Myopia	24.6291	6.37	571	-0.75
1392	25	Female	Myopia	24.9447	6.57	568	-1.75
1393	25	Female	Myopia	25.6492	6.47	551	-3.5
1394	25	Female	Myopia	25.0471	7.17	573	-2
1395	25	Female	Myopia	25.4643	7.37	573	-3
1396	25	Female	Myopia	25.1609	7.47	581	-2.25
1397	25	Female	Myopia	24.7525	6.77	558	-1.25
1398	25	Female	Myopia	25.1016	7.47	565	-2
1399	25	Female	Myopia	25.4135	7.37	563	-3
1400	25	Female	Myopia	25.1967	6.47	573	-2.25
1401	25	Female	Myopia	25.4863	7.37	573	-3
1402	25	Female	Myopia	24.8306	6.77	573	-1.5
1403	25	Female	Myopia	24.9848	7.07	565	-1.75
1404	25	Female	Myopia	25.1431	7.27	563	-2.25
1405	25	Female	Myopia	25.0012	6.67	563	-1.75
1406	25	Female	Myopia	25.5565	7.47	573	-3.25
1407	25	Female	Myopia	24.7884	6.67	581	-1.25
1408	25	Female	Myopia	24.6537	6.47	558	-1
1409	25	Female	Myopia	24.9636	7.47	573	-1.75
1410	25	Female	Myopia	25.5616	6.97	589	-3.25
1411	25	Female	Myopia	26.49	6.37	593	-5.75
1412	25	Female	Myopia	24.8152	7.67	573	-1.25
1413	25	Female	Myopia	25.2609	7.67	583	-2.5
1414	25	Female	Myopia	25.1571	7.57	573	-2.25
1415	25	Female	Myopia	24.6296	6.87	569	-0.75
1416	25	Female	Myopia	24.9193	6.47	555	-1.5
1417	25	Female	Myopia	25.4338	6.87	573	-3
1418	25	Female	Myopia	24.6746	7.37	545	-1
1419	25	Female	Myopia	25.0728	6.87	569	-2
1420	25	Female	Myopia	25.2794	7.27	573	-2.5
1421	25	Female	Myopia	25.4158	6.37	583	-3
1422	25	Female	Myopia	24.9784	7.47	549	-1.75
1423	25	Female	Myopia	25.3489	7.37	577	-2.75
1424	25	Female	Myopia	25.4963	7.57	573	-3.25
1425	25	Female	Myopia	24.8495	6.87	558	-1.5
1426	25	Female	Myopia	24.752	6.47	558	-1.25
1427	25	Female	Myopia	25.5803	6.57	573	-3.25
1428	25	Female	Myopia	24.9605	6.57	557	-1.75
1429	25	Female	Myopia	24.49	6.47	558	-0.5
1430	25	Female	Myopia	26.39	6.87	595	-5.5
1431	25	Female	Myopia	25.2823	6.87	573	-2.5
1432	25	Female	Myopia	25.1192	6.87	573	-2.25
1433	25	Female	Myopia	25.1743	7.37	581	-2.25
1434	25	Female	Myopia	25.6959	7.47	583	-3.75
1435	25	Female	Myopia	25.3601	6.77	553	-2.75
1436	25	Female	Myopia	24.8476	6.47	547	-1.5
1437	25	Female	Myopia	25.589	7.17	578	-3.5
1438	25	Female	Myopia	25.3559	7.67	583	-2.75
1439	25	Female	Myopia	25.8266	6.27	583	-4
1440	25	Female	Myopia	25.1935	6.57	569	-2.25
1441	25	Female	Myopia	26.19	6.27	599	-5
1442	25	Female	Myopia	25.3633	6.77	557	-2.75
1443	25	Female	Myopia	24.7249	6.67	558	-1
1444	25	Female	Myopia	25.6096	6.97	593	-3.5
1445	25	Female	Myopia	24.886	6.97	558	-1.5
1446	25	Female	Myopia	25.8923	7.57	557	-4.25
1447	25	Female	Myopia	25.2388	7.07	583	-2.5
1448	25	Female	Myopia	24.7168	7.47	579	-1
1449	25	Female	Myopia	25.1534	7.57	573	-2.25
1450	25	Female	Myopia	24.8265	7.07	573	-1.5
1451	25	Female	Myopia	26.29	7.07	593	-5.25
1452	25	Female	Myopia	24.6159	7.57	558	-0.75
1453	25	Female	Myopia	26.59	6.57	633	-6
1454	25	Female	Myopia	25.5598	6.57	573	-3.25
1455	25	Female	Myopia	25.2813	6.47	583	-2.5
1456	25	Female	Myopia	25.1842	7.57	583	-2.25
1457	25	Female	Myopia	24.8206	7.57	577	-1.25
1458	25	Female	Myopia	24.6186	6.47	579	-0.75
1459	25	Female	Myopia	25.2557	6.77	569	-2.5
1460	25	Female	Myopia	26.59	7.67	633	-6
1461	25	Female	Myopia	24.9582	7.47	577	-1.75
1462	25	Female	Myopia	24.9575	6.67	573	-1.75
1463	25	Female	Myopia	25.1472	7.27	569	-2.25
1464	25	Female	Myopia	25.0206	6.37	558	-2
1465	25	Female	Myopia	24.8654	6.87	553	-1.5
1466	25	Female	Myopia	25.1218	7.07	565	-2.25
1467	25	Female	Myopia	24.5717	6.57	558	-0.75
1468	25	Female	Myopia	25.231	7.37	573	-2.5
1469	24	Male	Myopia	25.4053	6.9	567	-3.25
1470	24	Male	Myopia	26.1	7.4	591	-6
1471	24	Male	Myopia	24.9248	6.1	552	-1.75
1472	24	Male	Myopia	25.1112	6.3	567	-2.25
1473	24	Male	Myopia	25.503	7.1	551	-3.5
1474	24	Male	Myopia	25.0187	7	549	-2
1475	24	Male	Myopia	24.8934	6.9	549	-1.75
1476	24	Male	Myopia	25.147	6.1	567	-2.5
1477	24	Male	Myopia	25.1247	7.2	575	-2.5
1478	24	Male	Myopia	24.9454	7	552	-2
1479	24	Male	Myopia	25.0738	7	567	-2.25
1480	24	Male	Myopia	24.4976	6.7	552	-0.75
1481	24	Male	Myopia	25.0849	6.1	567	-2.25
1482	24	Male	Myopia	24.7595	7.1	552	-1.5
1483	24	Male	Myopia	25.4147	6.6	551	-3.25
1484	24	Male	Myopia	24.8294	7.2	552	-1.5
1485	24	Male	Myopia	24.7801	6.9	552	-1.5
1486	24	Male	Myopia	25.3644	7.3	567	-3
1487	24	Male	Myopia	24.8575	6.7	552	-1.75
1488	24	Male	Myopia	25.2716	6.8	567	-2.75
1489	24	Male	Myopia	24.7378	6.2	552	-1.5
1490	24	Male	Myopia	24.4	7	552	-0.5
1491	24	Male	Myopia	24.6761	7.5	547	-1.25
1492	24	Male	Myopia	25.474	6.5	573	-3.25
1493	24	Male	Myopia	25.1329	6.9	567	-2.5
1494	24	Male	Myopia	24.9317	7.2	553	-2
1495	24	Male	Myopia	25.026	6.9	567	-2.25
1496	24	Male	Myopia	25.4091	7	567	-3.25
1497	24	Male	Myopia	24.7198	6.4	561	-1.25
1498	24	Male	Myopia	25.0293	6.9	567	-2.25
1499	24	Male	Myopia	25.0279	6.6	573	-2.25
1500	24	Male	Myopia	24.7975	7	552	-1.5
1501	24	Male	Myopia	24.4628	6.7	552	-0.75
1502	24	Male	Myopia	24.9975	7	551	-2
1503	24	Male	Myopia	24.5425	7.5	552	-0.75
1504	24	Male	Myopia	25.2944	7.2	581	-2.75
1505	24	Male	Myopia	24.8929	6.7	553	-1.75
1506	24	Male	Myopia	25.3239	7.1	555	-3
1507	24	Male	Myopia	24.8003	7	567	-1.5
1508	24	Male	Myopia	24.5945	6.1	567	-1
1509	24	Male	Myopia	25.5059	6.6	567	-3.5
1510	24	Male	Myopia	25.1156	6.2	543	-2.25
1511	24	Male	Myopia	24.9294	7.2	567	-2
1512	24	Male	Myopia	25.3832	7.3	567	-3
1513	24	Male	Myopia	24.4501	7.4	557	-0.75
1514	24	Male	Myopia	24.5727	6.2	575	-1
1515	24	Male	Myopia	25.9	7.4	577	-4.75
1516	24	Male	Myopia	25.11	7.3	567	-2.25
1517	24	Male	Myopia	24.8084	7.2	567	-1.5
1518	24	Male	Myopia	24.4	6.9	567	-0.5
1519	24	Male	Myopia	25.0881	6.3	571	-2.25
1520	24	Male	Myopia	25.1154	7.2	547	-2.25
1521	24	Male	Myopia	26.1	7	617	-6
1522	24	Male	Myopia	25.2481	6.7	567	-2.75
1523	24	Male	Myopia	25.2259	6.1	567	-2.75
1524	24	Male	Myopia	24.5675	7.5	562	-1
1525	25	Male	Myopia	24.8207	6.2	549	-1.5
1526	25	Male	Myopia	26.2	7	587	-5.25
1527	25	Male	Myopia	24.8505	6.8	567	-1.75
1528	25	Male	Myopia	24.8746	6.5	547	-1.75
1529	25	Male	Myopia	24.5195	6.6	567	-0.75
1530	25	Male	Myopia	25.8276	7.5	575	-4.25
1531	25	Male	Myopia	24.531	6.3	545	-0.75
1532	25	Male	Myopia	24.5675	6.9	562	-1
1533	25	Male	Myopia	24.4	7.2	543	-0.5
1534	25	Male	Myopia	26.2	7.3	587	-5.25
1535	25	Male	Myopia	25.7159	6.1	567	-4
1536	25	Male	Myopia	25.2251	7.1	549	-2.75
1537	25	Male	Myopia	24.9097	6.3	541	-1.75
1538	25	Male	Myopia	25.2614	6.8	567	-2.75
1539	25	Male	Myopia	25.5905	6.1	567	-3.5
1540	25	Male	Myopia	24.7262	7.1	567	-1.25
1541	25	Male	Myopia	24.5383	7.2	567	-0.75
1542	25	Male	Myopia	24.4	7.1	567	-0.5
1543	25	Male	Myopia	25.0285	7	567	-2.25
1544	25	Male	Myopia	24.7482	6.7	575	-1.5
1545	25	Male	Myopia	24.4	6.4	567	-0.5
1546	25	Male	Myopia	24.7384	7.2	562	-1.5
1547	25	Male	Myopia	25.1549	6.1	577	-2.5
1548	25	Male	Myopia	25.4209	7.2	567	-3.25
1549	25	Male	Myopia	25.1397	6.7	579	-2.5
1550	25	Male	Myopia	25.0436	6.5	585	-2.25
1551	25	Male	Myopia	24.5013	7.5	567	-0.75
1552	25	Male	Myopia	25.5406	7	567	-3.5
1553	25	Male	Myopia	25.1865	6.6	575	-2.5
1554	25	Male	Myopia	24.6088	6.8	547	-1
1555	25	Male	Myopia	25.935	7	585	-4.5
1556	25	Male	Myopia	24.5676	6.2	561	-1
1557	25	Male	Myopia	25.1278	7.2	581	-2.5
1558	25	Male	Myopia	24.4567	6.8	569	-0.75
1559	25	Male	Myopia	25.7531	7.5	567	-4
1560	25	Male	Myopia	25.3255	7	567	-3
1561	25	Male	Myopia	26.2	7.4	587	-5.25
1562	25	Male	Myopia	25.4847	7.4	567	-3.25
1563	25	Male	Myopia	24.7637	7.4	539	-1.5
1564	25	Male	Myopia	24.805	7	567	-1.5
1565	25	Male	Myopia	25.4225	6.2	551	-3.25
1566	25	Male	Myopia	25.3657	7.5	557	-3
1567	25	Male	Myopia	25.75	6.2	573	-5.25
1568	25	Male	Myopia	24.71	6.7	547	-1.25
1569	25	Male	Myopia	24.9176	6.4	567	-1.75
1570	25	Male	Myopia	25.796	6.9	567	-4.25
1571	26	Female	Myopia	25.5264	7.4	570	-3.25
1572	26	Female	Myopia	25.6951	7	570	-3.75
1573	26	Female	Myopia	24.5676	6.5	570	-0.75
1574	26	Female	Myopia	25.5724	6.7	570	-3.25
1575	26	Female	Myopia	25.2659	6.2	570	-2.5
1576	26	Female	Myopia	25.7579	7.6	576	-3.75
1577	26	Female	Myopia	24.9768	6.6	588	-1.75
1578	26	Female	Myopia	25.2057	6.4	554	-2.25
1579	26	Female	Myopia	24.8478	6.8	574	-1.5
1580	26	Female	Myopia	24.9709	7.3	570	-1.75
1581	26	Female	Myopia	25.1705	6.9	570	-2.25
1582	26	Female	Myopia	25.0565	6.8	570	-2
1583	26	Female	Myopia	24.5726	6.4	570	-0.75
1584	26	Female	Myopia	24.631	6.2	565	-0.75
1585	26	Female	Myopia	25.16	6.2	570	-2.25
1586	26	Female	Myopia	25.0232	7.1	570	-2
1587	26	Female	Myopia	24.9313	6.2	565	-1.75
1588	26	Female	Myopia	25.6657	6.7	570	-3.5
1589	26	Female	Myopia	24.923	7.3	556	-1.75
1590	26	Female	Myopia	25.0222	6.9	570	-2
1591	26	Female	Myopia	25.6649	6.6	596	-3.5
1592	26	Female	Myopia	26.29	6.5	580	-5.25
1593	26	Female	Myopia	24.49	7.4	556	-0.5
1594	26	Female	Myopia	25.2303	6.6	564	-2.5
1595	26	Female	Myopia	24.916	6.5	565	-1.5
1596	26	Female	Myopia	25.3509	6.6	570	-2.75
1597	26	Female	Myopia	24.49	6.5	556	-0.5
1598	26	Female	Myopia	25.3539	7.6	564	-2.75
1599	26	Female	Myopia	24.7311	6.8	556	-1.25
1600	26	Female	Myopia	25.3066	6.8	582	-2.75
1601	26	Female	Myopia	24.5624	6.2	560	-0.75
1602	26	Female	Myopia	25.9432	6.4	570	-4.25
1603	26	Female	Myopia	25.8495	6.2	570	-4
1604	26	Female	Myopia	25.9636	6.9	554	-4.25
1605	26	Female	Myopia	25.0584	6.2	570	-2
1606	26	Female	Myopia	25.4857	6.5	570	-3
1607	26	Female	Myopia	24.8804	6.5	556	-1.5
1608	26	Female	Myopia	25.1312	7.4	598	-2.25
1609	26	Female	Myopia	24.49	6.6	556	-0.5
1610	26	Female	Myopia	24.803	6.3	560	-1.25
1611	26	Female	Myopia	25.306	7.5	570	-2.75
1612	26	Female	Myopia	25.2779	6.2	590	-2.5
1613	26	Female	Myopia	25.1867	7.6	552	-2.25
1614	26	Female	Myopia	24.8169	7	550	-1.25
1615	26	Female	Myopia	25.2397	6.8	574	-2.5
1616	26	Female	Myopia	24.9412	6.9	556	-1.75
1617	26	Female	Myopia	25.2248	6.2	570	-2.5
1618	26	Female	Myopia	24.6529	7.1	558	-1
1619	27	Female	Myopia	25.1543	6.9	570	-2.25
1620	27	Female	Myopia	24.6157	6.3	560	-0.75
1621	27	Female	Myopia	26.39	6.9	572	-5.5
1622	27	Female	Myopia	24.6977	6.8	568	-1
1623	27	Female	Myopia	25.1954	7.5	552	-2.25
1624	27	Female	Myopia	24.6178	7.4	556	-0.75
1625	27	Female	Myopia	25.2819	6.5	558	-2.5
1626	27	Female	Myopia	25.5559	7	570	-3.25
1627	27	Female	Myopia	25.0188	7	570	-2
1628	27	Female	Myopia	25.2768	6.3	580	-2.5
1629	27	Female	Myopia	24.6927	7.4	556	-1
1630	27	Female	Myopia	25.8162	7.2	570	-4
1631	27	Female	Myopia	24.667	7.4	556	-1
1632	27	Female	Myopia	24.5561	6.5	556	-0.75
1633	27	Female	Myopia	24.6703	6.8	556	-1
1634	27	Female	Myopia	25.6166	7.5	570	-3.5
1635	27	Female	Myopia	24.7963	7.4	560	-1.25
1636	27	Female	Myopia	25.9136	6.7	570	-4.25
1637	27	Female	Myopia	25.3899	6.7	580	-2.75
1638	27	Female	Myopia	24.7856	6.3	556	-1.25
1639	27	Female	Myopia	24.8653	7.1	564	-1.5
1640	27	Female	Myopia	25.5751	7.4	584	-3.25
1641	27	Female	Myopia	25.4164	7.4	570	-3
1642	27	Female	Myopia	25.8626	6.8	598	-4
1643	27	Female	Myopia	24.8643	7.2	582	-1.5
1644	27	Female	Myopia	25.8345	7.3	556	-4
1645	27	Female	Myopia	25.242	6.8	578	-2.5
1646	27	Female	Myopia	24.5866	6.8	584	-0.75
1647	27	Female	Myopia	25.1349	7.2	570	-2.25
1648	27	Female	Myopia	24.8891	6.3	556	-1.5
1649	27	Female	Myopia	25.5177	7.6	548	-3.25
1650	27	Female	Myopia	25.4136	6.6	550	-3
1651	27	Female	Myopia	26.49	6.4	590	-5.75
1652	27	Female	Myopia	25.2361	7.2	570	-2.5
1653	27	Female	Myopia	25.6544	7.4	554	-3.5
1654	27	Female	Myopia	25.3795	7.1	556	-2.75
1655	27	Female	Myopia	25.3192	7.6	570	-2.75
1656	27	Female	Myopia	24.946	6.4	556	-1.75
1657	27	Female	Myopia	24.595	6.9	548	-0.75
1658	27	Female	Myopia	24.5377	6.6	555	-0.5
1659	27	Female	Myopia	24.9242	7.6	568	-1.75
1660	27	Female	Myopia	25.2305	7.4	552	-2.5
1661	27	Female	Myopia	25.3826	6.4	580	-2.75
1662	27	Female	Myopia	25.0565	6.4	542	-2
1663	27	Female	Myopia	25.5509	6.9	548	-3.25
1664	27	Female	Myopia	24.6922	7.2	556	-1
1665	27	Female	Myopia	25.1782	6.8	570	-2.25
1666	27	Female	Myopia	25.1166	6.5	575	-2.25
1667	27	Female	Myopia	25.5472	6.5	570	-3.25
1668	26	Male	Myopia	24.7709	7.34	548	-2
1669	26	Male	Myopia	24.6943	6.54	560	-1.75
1670	26	Male	Myopia	25.1278	7.34	562	-2.75
1671	26	Male	Myopia	24.7368	6.84	544	-1.75
1672	26	Male	Myopia	25.0691	6.64	562	-2.75
1673	26	Male	Myopia	24.5269	6.14	562	-1.25
1674	26	Male	Myopia	25.2691	6.44	578	-3.25
1675	26	Male	Myopia	24.6856	7.44	548	-1.75
1676	26	Male	Myopia	25.0043	6.14	562	-2.5
1677	26	Male	Myopia	24.2941	6.84	548	-0.75
1678	26	Male	Myopia	25.94	7.14	622	-6
1679	26	Male	Myopia	24.5707	6.64	548	-1.25
1680	26	Male	Myopia	24.24	7.24	548	-0.5
1681	26	Male	Myopia	24.6499	7.44	534	-1.5
1682	26	Male	Myopia	24.3085	6.34	570	-0.75
1683	26	Male	Myopia	25.39	6.04	562	-3.5
1684	26	Male	Myopia	24.5736	6.84	548	-1.25
1685	26	Male	Myopia	24.9378	7.14	562	-2.25
1686	26	Male	Myopia	24.745	6.24	568	-1.75
1687	26	Male	Myopia	25.2861	6.14	572	-3.25
1688	26	Male	Myopia	25.0896	6.54	536	-2.75
1689	26	Male	Myopia	24.806	6.34	562	-2
1690	26	Male	Myopia	24.4154	7.04	540	-1
1691	26	Male	Myopia	25.3008	7.04	572	-3.25
1692	26	Male	Myopia	25.2121	6.04	562	-3
1693	26	Male	Myopia	24.3171	6.94	570	-0.75
1694	26	Male	Myopia	24.24	6.34	548	-0.5
1695	26	Male	Myopia	24.4296	7.04	548	-1
1696	26	Male	Myopia	25.5931	6.54	562	-4
1697	26	Male	Myopia	24.5468	7.04	548	-1.25
1698	26	Male	Myopia	24.6224	6.64	548	-1.5
1699	26	Male	Myopia	25.0965	6.14	562	-2.75
1700	27	Male	Myopia	25.3147	6.84	550	-3.25
1701	27	Male	Myopia	24.4324	6.24	554	-1
1702	27	Male	Myopia	24.865	7.04	562	-2.25
1703	27	Male	Myopia	24.5834	6.94	568	-1.5
1704	27	Male	Myopia	25.2976	6.14	572	-3.25
1705	27	Male	Myopia	25.54	6.14	582	-5
1706	27	Male	Myopia	25.2248	6.64	572	-3
1707	27	Male	Myopia	24.24	6.64	548	-0.5
1708	27	Male	Myopia	24.6249	7.24	544	-1.5
1709	27	Male	Myopia	25.1154	6.04	562	-2.75
1710	27	Male	Myopia	24.7594	6.64	548	-1.75
1711	27	Male	Myopia	24.5968	6.24	562	-1.5
1712	27	Male	Myopia	24.24	6.84	548	-0.5
1713	27	Male	Myopia	24.8264	6.44	570	-2
1714	27	Male	Myopia	24.7193	7.04	562	-1.75
1715	27	Male	Myopia	25.54	6.74	587	-4.5
1716	27	Male	Myopia	24.3411	6.04	548	-0.75
1717	27	Male	Myopia	24.6789	6.74	548	-1.75
1718	27	Male	Myopia	24.8386	6.34	548	-2
1719	27	Male	Myopia	25.3955	6.34	587	-3.5
1720	27	Male	Myopia	24.6157	6.94	548	-1.5
1721	27	Male	Myopia	24.6548	6.64	548	-1.5
1722	27	Male	Myopia	24.6016	6.44	548	-1.5
1723	27	Male	Myopia	25.0563	6.94	558	-2.75
1724	27	Male	Myopia	24.4547	7.24	568	-1
1725	27	Male	Myopia	24.8485	6.24	548	-2
1726	27	Male	Myopia	24.24	6.84	548	-0.5
1727	27	Male	Myopia	25.3539	7.44	570	-3.5
1728	27	Male	Myopia	24.6211	7.44	552	-1.5
1729	27	Male	Myopia	24.7816	7.24	568	-2
1730	27	Male	Myopia	24.3667	7.34	552	-0.75
1731	27	Male	Myopia	24.6685	7.34	552	-1.5
1732	27	Male	Myopia	25.0261	7.24	572	-2.5
1733	27	Male	Myopia	25.3178	7.34	536	-3.25
1734	28	Female	Myopia	25.3137	6.8	570	-2.75
1735	28	Female	Myopia	25.5871	7.2	544	-3.25
1736	28	Female	Myopia	24.7592	7.5	564	-1.25
1737	28	Female	Myopia	24.8181	6.9	560	-1.25
1738	28	Female	Myopia	24.8609	7.6	560	-1.5
1739	28	Female	Myopia	25.1006	7.4	596	-2
1740	28	Female	Myopia	25.3155	6.5	558	-2.75
1741	28	Female	Myopia	24.8437	6.7	566	-1.5
1742	28	Female	Myopia	25.4312	7.1	542	-3
1743	28	Female	Myopia	25.3319	6.6	562	-2.75
1744	28	Female	Myopia	25.1829	7.4	566	-2.25
1745	28	Female	Myopia	25.0596	6.7	562	-2
1746	28	Female	Myopia	25.0802	7	570	-2
1747	28	Female	Myopia	25.0083	7.5	560	-1.75
1748	28	Female	Myopia	24.49	7.4	560	-0.5
1749	28	Female	Myopia	24.6724	7.1	560	-1
1750	28	Female	Myopia	25.1578	6.9	570	-2.25
1751	28	Female	Myopia	24.9693	6.4	560	-1.75
1752	28	Female	Myopia	25.1488	7.4	572	-2.25
1753	28	Female	Myopia	24.8654	6.4	562	-1.5
1754	28	Female	Myopia	25.8307	7.6	570	-4
1755	28	Female	Myopia	26.4	6.7	625	-6
1756	28	Female	Myopia	25.4376	6.3	544	-3
1757	28	Female	Myopia	24.9501	6.6	566	-1.75
1758	28	Female	Myopia	25.1981	6.6	552	-2.25
1759	28	Female	Myopia	24.7722	6.3	560	-1.25
1760	28	Female	Myopia	25.1534	6.5	584	-2.25
1761	28	Female	Myopia	25.6723	7.5	570	-3.5
1762	28	Female	Myopia	24.5857	6.3	578	-0.75
1763	28	Female	Myopia	25.2274	7.4	570	-2.5
1764	28	Female	Myopia	24.7196	7.4	560	-1
1765	28	Female	Myopia	24.9152	6.4	550	-1.5
1766	28	Female	Myopia	25.0659	6.3	582	-2
1767	28	Female	Myopia	25.6624	7.4	552	-3.5
1768	28	Female	Myopia	25.2334	6.7	570	-2.5
1769	28	Female	Myopia	24.9704	6.3	560	-1.75
1770	28	Female	Myopia	25.5913	7.4	570	-3.5
1771	29	Female	Myopia	25.3082	6.9	570	-2.75
1772	29	Female	Myopia	25.3712	7.6	570	-2.75
1773	29	Female	Myopia	24.9801	7.3	560	-1.75
1774	29	Female	Myopia	24.5531	7.6	565	-0.75
1775	29	Female	Myopia	24.56	7.2	566	-0.75
1776	29	Female	Myopia	25.2997	6.6	560	-2.5
1777	29	Female	Myopia	25.1908	6.7	548	-2.25
1778	29	Female	Myopia	25.4373	6.4	548	-3
1779	29	Female	Myopia	24.9576	7.6	556	-1.75
1780	29	Female	Myopia	25.2336	6.3	570	-2.5
1781	29	Female	Myopia	25.5363	6.9	584	-3.25
1782	29	Female	Myopia	24.7733	6.6	560	-1.25
1783	29	Female	Myopia	25.033	6.2	570	-2
1784	29	Female	Myopia	25.4598	6.6	570	-3
1785	29	Female	Myopia	25.2476	7	570	-2.5
1786	29	Female	Myopia	25.1804	7.6	566	-2.25
1787	29	Female	Myopia	25.2562	7.5	570	-2.5
1788	29	Female	Myopia	25.175	7.4	570	-2.25
1789	29	Female	Myopia	24.6031	7.3	560	-0.75
1790	29	Female	Myopia	24.8838	6.4	562	-1.5
1791	29	Female	Myopia	24.8899	7.6	544	-1.5
1792	29	Female	Myopia	25.1916	6.5	580	-2.25
1793	29	Female	Myopia	25.8015	6.9	552	-4
1794	29	Female	Myopia	25.3948	7.1	552	-2.75
1795	29	Female	Myopia	25.4038	6.2	570	-3
1796	29	Female	Myopia	25.781	7.4	570	-4
1797	29	Female	Myopia	25.0277	7.4	570	-2
1798	29	Female	Myopia	25.0877	7	570	-2
1799	29	Female	Myopia	26.39	7.6	590	-5.5
1800	29	Female	Myopia	26.29	7.6	594	-5.25
1801	28	Male	Myopia	24.8157	6.24	562	-2
1802	28	Male	Myopia	25.0555	6.34	562	-2.75
1803	28	Male	Myopia	24.259	7.34	552	-0.5
1804	28	Male	Myopia	24.9956	6.94	580	-2.5
1805	28	Male	Myopia	24.8596	7.04	580	-2
1806	28	Male	Myopia	24.8581	7.34	534	-2
1807	28	Male	Myopia	25.64	7.44	564	-4.75
1808	28	Male	Myopia	24.9057	7.14	538	-2.25
1809	28	Male	Myopia	24.8956	7.24	536	-2.25
1810	28	Male	Myopia	25.1488	6.24	540	-3
1811	28	Male	Myopia	24.8996	6.74	562	-2.25
1812	28	Male	Myopia	25.0652	6.14	562	-2.75
1813	28	Male	Myopia	24.593	7.14	552	-1.5
1814	28	Male	Myopia	25.0293	6.14	540	-2.5
1815	28	Male	Myopia	25.5884	7.34	540	-4
1816	29	Male	Myopia	24.5952	6.74	552	-1.5
1817	29	Male	Myopia	24.6741	6.34	564	-1.75
1818	29	Male	Myopia	24.24	6.54	552	-0.5
1819	29	Male	Myopia	25.0742	6.34	556	-2.75
1820	29	Male	Myopia	24.7892	6.44	556	-2
1821	29	Male	Myopia	25.1379	6.74	562	-2.75
1822	29	Male	Myopia	24.6563	7.04	568	-1.5
1823	29	Male	Myopia	24.3677	6.04	536	-0.75
1824	29	Male	Myopia	25.3241	7.24	572	-3.25
1825	29	Male	Myopia	25.3218	7.14	562	-3.25
1826	29	Male	Myopia	24.7924	7.34	536	-2
1827	30	Female	Myopia	24.69	6.4	578	-0.5
1828	30	Female	Myopia	26.0612	7.1	580	-4
1829	30	Female	Myopia	25.85	6.4	580	-3.5
1830	30	Female	Myopia	26.1	7.3	605	-4.75
1831	30	Female	Myopia	24.69	6.2	570	-0.5
1832	30	Female	Myopia	25.0309	6.8	570	-1.5
1833	30	Female	Myopia	25.2182	7	580	-2
1834	30	Female	Myopia	25.2224	7	580	-2
1835	30	Female	Myopia	25.9499	6.7	576	-3.75
1836	31	Female	Myopia	24.9678	6.7	552	-1.25
1837	31	Female	Myopia	25.9904	6.8	580	-4
1838	31	Female	Myopia	25.2408	6.5	580	-2
1839	31	Female	Myopia	25.1548	6.3	580	-1.75
1840	31	Female	Myopia	25.512	7.2	578	-2.75
1841	31	Female	Myopia	25.4172	7.4	598	-2.5
1842	30	Male	Myopia	24.6495	7.13	544	-1.25
1843	30	Male	Myopia	25.1314	7.03	570	-2.5
1844	30	Male	Myopia	24.6641	7.43	578	-1.25
1845	30	Male	Myopia	25.4401	6.93	550	-3.25
1846	30	Male	Myopia	25.402	6.33	565	-3
1847	30	Male	Myopia	24.6159	6.43	570	-1
1848	30	Male	Myopia	25.2247	7.33	566	-2.75
1849	30	Male	Myopia	25.2588	6.43	565	-2.75
1850	30	Male	Myopia	25.0798	7.53	565	-2.25
1851	31	Male	Myopia	24.8777	7.13	550	-1.75
1852	31	Male	Myopia	25.2985	6.83	565	-2.75
1853	31	Male	Myopia	25.3045	7.63	556	-2.75
1854	31	Male	Myopia	24.797	6.83	560	-1.5
1855	31	Male	Myopia	24.595	7.53	560	-1
1856	31	Male	Myopia	25.1703	6.53	565	-2.5
1857	31	Male	Myopia	25.6056	7.63	566	-3.75
1858	31	Male	Myopia	25.3071	6.73	578	-3
1859	32	Female	Myopia	25.1958	7.4	570	-1.75
1860	32	Female	Myopia	24.925	6.3	570	-1
1861	33	Female	Myopia	25.1645	6.5	570	-1.75
1862	33	Female	Myopia	25.4843	6.1	580	-2.5
1863	33	Female	Myopia	24.9769	6.6	570	-1.25
1864	32	Male	Myopia	25.5661	6.83	580	-3.5
1865	32	Male	Myopia	25.1357	7.63	565	-2.5
1866	32	Male	Myopia	25.7471	7.33	596	-4
1867	32	Male	Myopia	24.6715	6.93	560	-1.25
1868	33	Male	Myopia	24.8447	6.63	560	-1.75
1869	33	Male	Myopia	24.968	6.23	560	-2
1870	33	Male	Myopia	25.3483	7.13	568	-3
1871	33	Male	Myopia	25.3043	7.63	565	-2.75
1872	18	Female	Hyperopia	23.25	8.2	510	1
1873	18	Female	Hyperopia	21.95	8.1	475	3.25
1874	18	Female	Hyperopia	22.35	8	490	2.5
1875	18	Female	Hyperopia	22.15	8.4	490	2.75
1876	18	Female	Hyperopia	22.65	8.5	495	2
1877	18	Female	Hyperopia	23.45	8.4	500	0.5
1878	18	Female	Hyperopia	23.25	8.6	510	1
1879	18	Female	Hyperopia	22.15	8.8	490	2.75
1880	18	Female	Hyperopia	23.65	8.4	500	0.5
1881	18	Female	Hyperopia	23.05	8.3	495	1.25
1882	18	Female	Hyperopia	21.85	8	475	3.5
1883	18	Female	Hyperopia	23.65	9.1	500	0.5
1884	18	Female	Hyperopia	23.25	8.6	506	1
1885	18	Female	Hyperopia	22.75	8.6	495	1.75
1886	18	Female	Hyperopia	23.35	9	500	0.75
1887	18	Female	Hyperopia	23.05	8.9	495	1.25
1888	18	Female	Hyperopia	21.95	9.1	475	3.25
1889	18	Female	Hyperopia	21.75	8.8	475	3.5
1890	18	Female	Hyperopia	23.25	8.1	510	1
1891	18	Female	Hyperopia	23.85	8.1	500	0.5
1892	18	Female	Hyperopia	23.55	8.6	500	0.5
1893	18	Female	Hyperopia	22.35	9.1	490	2.5
1894	18	Female	Hyperopia	22.05	8.7	475	3
1895	18	Female	Hyperopia	23.75	8.1	500	0.5
1896	18	Female	Hyperopia	23.75	8.6	500	0.5
1897	18	Female	Hyperopia	21.85	8	475	3.5
1898	18	Female	Hyperopia	22.95	8.3	495	1.5
1899	18	Female	Hyperopia	22.65	9.1	495	2
1900	18	Female	Hyperopia	22.45	8.9	490	2.25
1901	18	Female	Hyperopia	23.25	8.8	510	1
1902	18	Female	Hyperopia	22.25	8.6	490	2.75
1903	18	Female	Hyperopia	23.05	8.3	495	1.25
1904	18	Female	Hyperopia	21.85	8	475	3.5
1905	18	Female	Hyperopia	21.75	8.9	475	3.5
1906	18	Female	Hyperopia	21.75	8	475	3.5
1907	18	Male	Hyperopia	22.45	8.3	490	2.25
1908	18	Male	Hyperopia	21.85	8.5	475	3.5
1909	18	Male	Hyperopia	23.55	8	500	0.5
1910	18	Male	Hyperopia	22.15	9	490	2.75
1911	18	Male	Hyperopia	23.75	8.4	522	0.5
1912	18	Male	Hyperopia	22.65	8.5	495	2
1913	18	Male	Hyperopia	23.85	8.6	500	0.5
1914	18	Male	Hyperopia	22.05	8.4	475	3
1915	18	Male	Hyperopia	21.75	8.7	475	3.5
1916	18	Male	Hyperopia	23.35	8.9	500	0.75
1917	18	Male	Hyperopia	23.25	8.9	510	1
1918	18	Male	Hyperopia	22.65	7.9	495	2
1919	18	Male	Hyperopia	22.55	8.3	490	2.25
1920	18	Male	Hyperopia	21.85	8	475	3.5
1921	18	Male	Hyperopia	23.75	8.6	500	0.5
1922	18	Male	Hyperopia	22.85	8.7	495	1.75
1923	18	Male	Hyperopia	22.95	9	495	1.5
1924	18	Male	Hyperopia	23.05	8.5	495	1.25
1925	19	Female	Hyperopia	23.45	7.9	500	0.5
1926	19	Female	Hyperopia	23.45	9.1	500	0.5
1927	19	Female	Hyperopia	22.95	8.6	495	1.5
1928	19	Female	Hyperopia	22.05	8.7	475	3
1929	19	Female	Hyperopia	22.35	8.6	490	2.5
1930	19	Female	Hyperopia	22.65	8	495	2
1931	19	Female	Hyperopia	23.15	8.4	510	1
1932	19	Female	Hyperopia	22.45	9.1	490	2.25
1933	19	Female	Hyperopia	23.15	8.2	510	1
1934	19	Female	Hyperopia	22.45	8.1	490	2.25
1935	19	Female	Hyperopia	21.95	8.6	475	3.25
1936	19	Female	Hyperopia	22.55	8.6	490	2.25
1937	19	Female	Hyperopia	23.85	9.1	500	0.5
1938	19	Female	Hyperopia	21.95	7.9	475	3.25
1939	19	Female	Hyperopia	21.95	8.8	475	3.25
1940	19	Female	Hyperopia	23.75	8.9	500	0.5
1941	19	Female	Hyperopia	23.45	8	500	0.5
1942	19	Female	Hyperopia	22.35	8	490	2.5
1943	19	Male	Hyperopia	22.95	8.8	495	1.5
1944	19	Male	Hyperopia	22.95	8.5	495	1.5
1945	19	Male	Hyperopia	23.15	8.4	522	1
1946	19	Male	Hyperopia	22.35	8.3	490	2.5
1947	19	Male	Hyperopia	23.05	8.3	495	1.25
1948	19	Male	Hyperopia	22.55	8	490	2.25
1949	19	Male	Hyperopia	22.15	9	490	2.75
1950	19	Male	Hyperopia	21.75	8.6	475	3.5
1951	19	Male	Hyperopia	23.85	8	500	0.5
1952	18	Male	Hyperopia	22.3	8.4	490	2.5
1953	18	Male	Hyperopia	21.5	8	475	4
1954	18	Male	Hyperopia	22.6	8.2	495	2
1955	18	Male	Hyperopia	22.7	8.1	495	2
1956	18	Male	Hyperopia	22.4	8	490	2.5
1957	18	Male	Hyperopia	22.5	7.9	490	2.25
1958	18	Male	Hyperopia	21.7	8.2	475	3.75
1959	18	Male	Hyperopia	21.9	7.9	475	3.25
1960	18	Male	Hyperopia	21.5	9.1	475	4
1961	18	Male	Hyperopia	23.6	8.8	500	0.5
1962	18	Male	Hyperopia	23.4	8.6	510	0.75
1963	18	Male	Hyperopia	22.6	8	495	2
1964	18	Male	Hyperopia	23.5	8.7	500	0.5
1965	18	Male	Hyperopia	23.6	8.7	500	0.5
1966	18	Male	Hyperopia	21.9	9.1	475	3.25
1967	18	Male	Hyperopia	22.5	8.2	490	2.25
1968	18	Male	Hyperopia	23.5	7.9	500	0.5
1969	18	Male	Hyperopia	23.5	8.9	500	0.5
1970	18	Male	Hyperopia	22.9	8.1	495	1.5
1971	18	Male	Hyperopia	22.1	8.1	475	3
1972	18	Male	Hyperopia	21.7	9	475	3.75
1973	18	Male	Hyperopia	22.5	8.8	490	2.25
1974	18	Male	Hyperopia	22.4	9	490	2.5
1975	18	Male	Hyperopia	21.7	8.3	475	3.75
1976	18	Male	Hyperopia	23	8.9	495	1.5
1977	18	Male	Hyperopia	21.8	8.8	475	3.5
1978	18	Male	Hyperopia	21.8	7.9	475	3.5
1979	18	Male	Hyperopia	23	8.5	495	1.5
1980	18	Male	Hyperopia	23.1	8.6	495	1.25
1981	18	Male	Hyperopia	23	8	495	1.5
1982	18	Male	Hyperopia	22.9	8.1	495	1.5
1983	18	Male	Hyperopia	22.7	8.9	495	2
1984	18	Male	Hyperopia	23.6	8	500	0.5
1985	18	Male	Hyperopia	23.2	9.1	510	1
1986	18	Male	Hyperopia	23.4	8.7	500	0.75
1987	18	Male	Hyperopia	23.4	7.9	500	0.75
1988	18	Male	Hyperopia	22.2	8.3	490	2.75
1989	19	Male	Hyperopia	22	9	475	3
1990	19	Male	Hyperopia	22.3	8.2	490	2.5
1991	19	Male	Hyperopia	22.9	9	495	1.5
1992	19	Male	Hyperopia	21.5	8.3	460	4
1993	19	Male	Hyperopia	21.5	8.6	460	4
1994	19	Male	Hyperopia	21.5	9.1	460	4
1995	19	Male	Hyperopia	22.8	8.4	495	1.75
1996	19	Male	Hyperopia	22.6	7.9	495	2
1997	19	Male	Hyperopia	21.9	8.8	460	3.25
1998	19	Male	Hyperopia	22.7	7.9	495	2
[truncated: 1,684 more rows]
